## **Antifungal benzimidazoles disrupt vasculature by targeting one of nine $\beta$ -tubulins**

Riddhiman K. Garge<sup>1,#</sup>, Hye Ji Cha<sup>1,2,#</sup>, Chanjae Lee<sup>1</sup>, Jimmy D. Gollihar<sup>1,3</sup>, Aashiq H. Kachroo<sup>4</sup>, John B. Wallingford<sup>1</sup>, Edward M. Marcotte<sup>1</sup>

<sup>1</sup>Department of Molecular Biosciences, The University of Texas at Austin, Austin, TX 78712, USA

<sup>2</sup>Division of Hematology/Oncology, Boston Children's Hospital and Department of Pediatric Oncology, Dana-Farber Cancer Institute, Harvard Stem Cell Institute, Harvard Medical School, Boston, MA 02115, USA

<sup>3</sup>US Army Research Laboratory – South, Austin, TX, USA

<sup>4</sup>The Department of Biology, Centre for Applied Synthetic Biology, Concordia University, Montreal QC H4B 1R6, Canada

<sup>#</sup>These authors contributed equally to this work

Correspondence: [marcotte@icmb.utexas.edu](mailto:marcotte@icmb.utexas.edu), [wallingford@austin.utexas.edu](mailto:wallingford@austin.utexas.edu)

## 1 **ABSTRACT**

2 Thiabendazole (TBZ) is an FDA-approved benzimidazole widely used for its antifungal and  
3 antihelminthic properties. We showed previously that TBZ is also a potent vascular disrupting  
4 agent and inhibits angiogenesis at the tissue level by dissociating vascular endothelial cells in  
5 newly formed blood vessels. Here, we uncover TBZ's molecular target and mechanism of action.  
6 Using human cell culture, molecular modeling, and humanized yeast, we find that TBZ selectively  
7 targets only 1 of 9 human  $\beta$ -tubulin isotypes (TUBB8) to specifically disrupt endothelial cell  
8 microtubules. By leveraging epidemiological pesticide resistance data and mining chemical  
9 features of commercially used benzimidazoles, we discover that a broader class of benzimidazole  
10 compounds, in extensive use for 50 years, also potently disrupt immature blood vessels and inhibit  
11 angiogenesis. Thus, besides identifying the molecular mechanism of benzimidazole-mediated  
12 vascular disruption, this study presents evidence relevant to the widespread use of these  
13 compounds while offering potential new clinical applications.

## 14 INTRODUCTION

15 The vascular system is built by the combination of *de novo* formation of blood vessels by  
16 vasculogenesis and the sprouting of new vessels from existing vessels via angiogenesis<sup>1,2</sup>.  
17 Imbalances in angiogenesis underlie a variety of physiological and pathological defects, including  
18 ischemic, inflammatory, and immune disorders<sup>1,3,4</sup>. Indeed, angiogenesis is central to tumor  
19 malignancy and cancer progression, as new blood vessels must be established to supply oxygen  
20 and nutrients to the growing tumor. Accordingly, inhibition of angiogenesis is now a well-  
21 recognized therapeutic avenue<sup>1-5</sup>. Defined angiogenesis inhibitors such as Avastin (FDA approved  
22 since 2004) are now in wide use in the clinic and, over the past 30 years, several dozen drugs have  
23 been approved or entered clinical trials as angiogenesis inhibitors<sup>5-9</sup>.

24 In recent years, a new class of anti-vascular drugs, termed vascular disrupting agents (VDAs), have  
25 gained attention as potential alternative therapeutics operating by distinct mechanisms<sup>10-13</sup>. Unlike  
26 angiogenesis inhibitors which selectively prevent the formation of new blood vessels, VDAs  
27 function by dismantling existing vasculature, making them potentially effective for therapies  
28 beyond cancer, for example in the treatment or control of macular degeneration and diabetic  
29 retinopathies<sup>14,15</sup>. While several VDAs have shown therapeutic potential, none have yet been  
30 approved, with several candidates still in clinical trials<sup>11,16,17</sup>.

31 Given the lengthy approval process, the failure of many drugs to succeed in clinical trials, and the  
32 high costs involved with developing new compounds, drug repurposing offers an attractive  
33 alternative for developing new therapies more quickly. We recently developed strategies to exploit  
34 data from diverse model organisms to identify both deeply conserved genetic networks as well as  
35 small molecules that may manipulate them<sup>18-20</sup>. This effort identified thiabendazole (TBZ) as both  
36 a novel angiogenesis inhibitor and VDA<sup>20</sup>.

37 TBZ is one of a large class of biologically active benzimidazole compounds that are widely used  
38 commercially or clinically, with applications ranging from photographic emulsions and circuit  
39 board manufacturing, to serving as one of the most common heterocyclic ring systems used for  
40 small molecule drugs<sup>21</sup>. The FDA approved TBZ in 1967 for human use for treating systemic  
41 fungal and helminthic infections, but it is more widely used in veterinary settings and in  
42 agricultural pesticides and preservatives. However, we found that TBZ also possesses potent

43 vascular disrupting ability, demonstrated *in vitro* in human cell culture and *in vivo* in mice and  
44 frogs, including for retarding tumor growth and reducing intratumoral vessel density in preclinical  
45 murine xenograft models<sup>20</sup>.

46 Several other VDAs have been reported to collapse the vasculature by inhibiting microtubule  
47 polymerization dynamics *via* binding  $\beta$ -tubulin<sup>11,16</sup>. Indeed, though the basis for TBZ's vascular  
48 disrupting action is unknown, it is proposed that TBZ's fungicidal action is mediated *via* disrupting  
49 fungal microtubule assembly and dynamics<sup>22,23</sup>. In particular, mutations in  $\beta$ -tubulin have been  
50 frequently found to confer resistance to TBZ in parasitic/invasive fungal and nematode species<sup>21-</sup>  
51 <sup>3</sup>. However, in humans, TBZ does not generally disrupt cell growth, and even in human umbilical  
52 vein endothelial (HUVEC) cells, while it somewhat reduced tubulin protein abundance it did not  
53 elicit gross defects in the microtubule cytoskeleton<sup>20</sup>. At angiogenesis-inhibiting doses, the overall  
54 development of TBZ treated animals is normal<sup>18</sup>, consistent with TBZ's safety record in humans  
55 and veterinary settings<sup>24</sup>. Therefore, we hypothesized that only certain types of human cells, such  
56 as subsets of endothelial cells involved in forming the vasculature, might be uniquely susceptible  
57 to TBZ.

58 Here, we experimentally determined TBZ's specific molecular target and cellular mechanism of  
59 vascular disrupting activity. We find that TBZ disrupts microtubule growth, with increased  
60 potency in endothelial cells. Using predictive molecular modeling, human cell culture, and  
61 humanized yeast, we find TBZ predominantly targets only one of nine human  $\beta$ -tubulins,  
62 suggesting an explanation for its cell-type specificity. Finally, based on epidemiological data  
63 mining and chemical structures, we discovered that a larger family of benzimidazoles—in clinical  
64 and commercial use for >50 years—all act as VDAs, disrupting the vasculature in a vertebrate  
65 animal model. These newly discovered VDAs include two World Health Organization (WHO)  
66 antihelmintics (albendazole and mebendazole) administered for the treatment of human intestinal  
67 infections, one broad-spectrum antifungal/antihelmintic (fenbendazole) used to treat farm animal  
68 infections, and two banned pesticides (benomyl and carbendazim) used to prevent wild fungal and  
69 nematode mediated crop destruction. Knowledge of their vascular disrupting activities should thus  
70 inform their use in at-risk individuals (such as during pregnancy) and opens new clinical  
71 applications for these compounds.

72

## 73 RESULTS

### 74 Thiabendazole disrupts microtubule plus ends in endothelial cells

75 Thiabendazole exhibits broad-spectrum activity against fungal and nematode crop pests<sup>25</sup>, but  
76 prior to demonstration of its VDA activity, it was generally thought to lack activity in tetrapods<sup>24</sup>.  
77 Its binding target and mechanism of vascular action remains poorly understood<sup>26</sup>, although *in vitro*  
78 studies have suggested various benzimidazole compounds inhibit cell growth by interfering with  
79 microtubule polymerization<sup>23,26–28</sup>. Benzimidazole suppressor screens in both *Saccharomyces*  
80 *cerevisiae* and *Caenorhabditis elegans* have independently identified resistance mutations  
81 occurring in  $\beta$ -tubulin genes, giving some insight into the binding site<sup>29,30</sup>. The case for a  $\beta$ -tubulin  
82 binding site is strengthened by numerous animal and agricultural studies also demonstrating  
83 resistance mutations arising repeatedly and independently across multiple parasitic nematode and  
84 fungal species infecting farm livestock and crops<sup>22,27,31–43</sup>.

85 To examine the effects of the microtubule cytoskeleton and dynamics in the presence of TBZ, we  
86 examined the localization of GFP-tagged EB1, which labels growing microtubule plus ends and  
87 provides a proxy for microtubule dynamics in both endothelial (HUVEC) and non-endothelial  
88 (NIH3T3) human cells. Despite the grossly normal architecture of microtubules in TBZ-treated  
89 HUVECs, TBZ significantly reduced the accumulation of EB1 at microtubule plus ends (**Fig. 1A',**  
90 **B'**) as compared to its control (**Fig. 1A, B**). Importantly, and consistent with the overall normal  
91 morphology and patterning of TBZ-treated embryos<sup>20</sup>, we found that TBZ had a substantially less  
92 robust effect on EB1 accumulation at microtubule plus ends in fibroblasts as compared to  
93 endothelial cells (**Fig. 1C-E**). These data are consistent with, and provide new insights into,  
94 previous studies showing that TBZ's interaction with tubulin interferes with microtubule  
95 polymerization in nematodes and fungi<sup>44,45</sup>.

### 96 Thiabendazole selectively targets TUBB8 among human $\beta$ -tubulins

97 Three commonly observed mutations in fungal and nematode  $\beta$ -tubulins (F200Y, E198A, and  
98 F167Y) confer resistance to TBZ (**Fig. 2A, B**), suggesting that its binding site is in the vicinity of  
99 these residues<sup>22,27,31–43</sup> (**File S1**). Based on the previously observed benzimidazole suppressor

100 mutations, we used 3D structural modeling to evaluate TBZ's potential binding sites in a fungal  
101  $\beta$ -tubulin. We first constructed 3D homology models of the *Schizosaccharomyces pombe* (fission  
102 yeast) wild-type and TBZ-resistant F200Y  $\beta$ -tubulins, based on the previously determined *Ovis*  
103 *aries*  $\beta$ -tubulin crystal structures (PDB: 3UT5<sup>46</sup> and 3N2G<sup>47</sup>) as templates. We computationally  
104 refined the structures and then evaluated potential binding modes of TBZ, as detailed in the  
105 Methods, using computational docking algorithms to localize TBZ's potential binding sites within  
106 the fungal  $\beta$ -tubulin structures (**Fig. S1**). We identified a binding site around F200 to be the most  
107 probable (**File S2**). We found that the preferred binding conformations of TBZ in both models  
108 (**Fig. S1**) situated close to (but distinct from) the colchicine binding site. These observations were  
109 in strong agreement with computational predictions made on parasitic  $\beta$ -tubulins binding  
110 benzimidazoles<sup>27</sup> and recent crystal structures of other benzimidazole derivatives binding to  
111 bovine brain  $\beta$ -tubulins<sup>48</sup>.

112 On measuring the polar contacts and clashing energies of TBZ with tubulin, we found that the  
113 wild-type  $\beta$ -tubulin bound to TBZ more favorably with contact energy (-9.9 kcal/mol) as compared  
114 to its F200Y counterpart, which showed unfavorable repulsions (+27.6 kcal/mol)(**File S2, S3**). For  
115 the wild-type protein, TBZ's polar contacts included E198 and Q134 (**Fig. 2C, S1**). Arene-  
116 hydrogen interactions between the drug and protein included contributions from F200, L250, and  
117 L253. However, for our F200Y mutant, repulsion was observed in our fixed ligand experiments  
118 predominantly caused by unfavorable contacts made with Y200, F240, L250, and L253 (**Fig. S1**).  
119 Our analyses suggest F200Y likely forms a hydrogen bond to E198 in the TBZ-resistant mutant,  
120 thus constricting the pocket and occluding binding.

121 Unlike fungi, tetrapods have multiple  $\beta$ -tubulin isotypes (here, we use the term isotype to denote  
122 the protein products of paralogous genes, in accordance with prior tubulin literature), and their  
123 expression varies in different cells and tissue types. For example, human tubulin  $\beta$ I  
124 (TUBB/TUBB5) is constitutively expressed in many cells and tissues, whereas  $\beta$ III (TUBB3) is  
125 exclusively enriched in neurons and the brain<sup>49,50</sup>. The specific roles of different  $\beta$ -tubulin isotypes  
126 are not yet fully understood, but recent studies indicate that their sequence diversity modulates  
127 binding affinity to tubulin-binding drugs and influences microtubule dynamics through distinct  
128 interactions with molecular motors<sup>50,51</sup>. The recurrence of TBZ resistance mutations at the same  
129 three loci across diverse fungi and nematodes (**File S1**) led us to hypothesize that human  $\beta$ -tubulin

130 isotypes might have differential sensitivities to TBZ by virtue of incorporating resistant residues  
131 at positions 167, 198, and 200, potentially explaining both its tissue-specific effects and generally  
132 low toxicity in humans.

133 Indeed, multiple sequence alignment of human and yeast  $\beta$ -tubulin genes indicated that while F167  
134 remained conserved across all the human isotypes, positions 198 and 200 were variable (**Fig. 2B**).  
135 Moreover, all human  $\beta$ -tubulin isotypes except TUBB1 and TUBB8 contain the F200Y resistance  
136 mutation. Because TUBB1 also harbors the other commonly observed E198A suppressor (**Fig.**  
137 **2B**), TUBB8 is the only human  $\beta$ -tubulin isotype predicted by sequence to be TBZ-sensitive.  
138 Given this variability across isotypes, we next asked how the E198A and F200Y mutations would  
139 be expected to affect TBZ's ability to bind at its predicted site in human isotypes.

140 We first evaluated this hypothesis computationally, by constructing 3D homology models for each  
141 of the human  $\beta$ -tubulin isotypes in the same manner as for the fungal model (see Methods). We  
142 then performed induced-fit docking with TBZ across our human  $\beta$ -tubulin models. Using a TBZ-  
143 wild-type fungal  $\beta$ -tubulin complex as a template, we docked TBZ into the same pocket in each of  
144 the human isotypes and measured protein-ligand interactions in the superimposed structures. In  
145 agreement with our primary sequence based predictions, TBZ fit well into the predicted binding  
146 pocket of only TUBB1 and TUBB8, which lack the F200Y mutation. Both showed favorable  
147 binding energies of -1.8 and -8.3 kcal/mol, respectively (**File S2**). The large difference in contact  
148 energy among these isotypes could be explained by position 198. In TUBB1, alanine occupies  
149 position 198, whereas TUBB8 has glutamate, which contributed heavily to the binding energy in  
150 all of our simulations when both F200 and E198 were present. Our data suggest that TBZ binding  
151 is stabilized by hydrogen bonds with residues Q134 and E198 in the presence of F200 (**Fig. S1,**  
152 **S2**). Taken together, our *in silico* studies predicted that TBZ should strongly bind TUBB8 and  
153 weakly bind TUBB1, but should not bind any other human  $\beta$ -tubulin isotypes.

#### 154 **Functional assays in human endothelial cells and humanized yeast confirm TBZ specificity** 155 **to human TUBB8**

156 Given TBZ's effects on human vascular endothelial cells and *in vivo* vascular disruption in  
157 *Xenopus* embryos<sup>20</sup>, we wished to test directly if TUBB8-specific binding could explain the  
158 compound's effects. We thus asked whether resistance to TBZ could be acquired by simply

159 supplying human  $\beta$ -tubulin isotypes predicted to be resistant. We tested this by two independent  
160 assays: (i) by overexpressing specific sensitive or resistant human  $\beta$ -tubulin isotypes in human  
161 endothelial cells and (ii) by humanizing Baker's yeast's  $\beta$ -tubulin *TUB2* to enable assays of  
162 individual human  $\beta$ -tubulin isotypes.

163 To test if microtubule dynamics in human cells could be significantly restored by supplying  
164 resistant  $\beta$ -tubulin isotypes, we singly transfected HUVEC cells with plasmids overexpressing  
165 either TUBB4 or TUBB8 and assayed microtubule dynamics by measuring the comet lengths of  
166 end-binding protein EB3 (**Fig. 3A**). Compared to untransfected HUVECs, we saw that  
167 overexpressing TUBB4 significantly rescued the decrease in comet length observed in TBZ-  
168 treated cells (**Fig. 3B**). Transfection with *TUBB8*, by contrast, had no effect (**Fig. 3B**). The  
169 differences became very significant after 30 minutes of exposure (**Fig. 3B**).

170 As an independent assay of TBZ action on human tubulins, we turned to humanized yeast, as our  
171 previous work showed that of the nine human  $\beta$ -tubulins, only TUBB4 and TUBB8 could  
172 functionally replace *TUB2* in *Saccharomyces cerevisiae*<sup>52</sup>. From our modeling and docking data,  
173 we hypothesized that yeast strains humanized with TUBB8 would be susceptible to TBZ while  
174 humanizing with TUBB4 would confer TBZ resistance. *Saccharomyces cerevisiae* possesses 2  $\alpha$ -  
175 tubulins (*TUB1* and *TUB3*) that interact with *TUB2* to form tubulin heterodimers, which in turn  
176 oligomerize to form microtubules. Wild-type BY4741 haploid strains are TBZ-resistant. However,  
177 previous studies have shown that on deleting *TUB3*, yeast strains become susceptible to  
178 benzimidazoles<sup>53</sup> likely due to reduced overall  $\alpha$ -tubulin stoichiometry or possibly by TBZ  
179 occluding *TUB2*'s dimerization with *TUB1* but not *TUB3*. Therefore, we performed all our yeast  
180 replacement assays in a *tub3 $\Delta$*  background, which yielded a clear growth defect in the presence of  
181 TBZ (**Fig. S3**). In order to test the effect of TBZ on human  $\beta$ -tubulin isotypes TUBB4 and TUBB8,  
182 we used CRISPR/Cas9 to construct yeast strains with these human isotypes in place of the  
183 endogenous *TUB2* and tested them in the presence or the absence of the drug (**Fig. 3A**). We found  
184 that strains possessing wild-type *TUB2* and human TUBB8 exhibited slow growth in the presence  
185 of TBZ (at conc. 20  $\mu$ g/ml). By contrast, the strain humanized with TUBB4, which is predicted to  
186 be resistant to TBZ, grew normally in the presence of TBZ (**Fig. 3C, S3A**).



187 Together with our *in silico* docking data, our results in HUVECs and humanized yeast indicate  
188 that TUBB8 is uniquely TBZ-sensitive, suggesting in turn that vascular endothelial cells are  
189 selectively sensitive to its loss.

## 190 **Benzimidazole resistance patterns and chemical similarities suggest additional VDAs**

191 Given the plethora of fungal and nematode studies on benzimidazole pesticide resistance in  
192 agriculture<sup>22,33–36,38,40–44,54–71</sup> (**Fig. 4A**), we reasoned that TBZ's molecular mechanism may extend  
193 to other commercially used benzimidazole compounds. Indeed, based on our experiments, a simple  
194 epidemiological signature should be sufficient to identify other pesticides that likely to function as  
195 vascular disrupting agents and angiogenesis inhibitors: (i) the compounds should be selectively  
196 toxic to fungal and nematode clades but demonstrate low toxicity in tetrapods, and (ii) sensitive  
197 species should specifically gain benzimidazole resistance from F167Y, E198A or F200Y  $\beta$ -tubulin  
198 mutations.

199 In order to understand how extensively distributed benzimidazole resistance was, we mined ~40  
200 years of literature to identify reported cases of pesticide resistant species seen in wild and parasitic  
201 nematodes and fungi. Benzimidazole resistance is a global phenomenon (**Fig. 4A**); across 9 major  
202 commercial benzimidazole-based pesticides, we found multiple independent instances of reported  
203 resistance across 27 (12 nematodes and 15 fungal) parasitic species (**File S1**), all of which  
204 exhibited at least 1 of the 3 signature  $\beta$ -tubulin mutations. These widespread patterns of  
205 benzimidazole pesticide resistance suggested at least 9 new candidate VDAs.

206 As a complement to the epidemiological data, we also considered chemical properties by asking if  
207 pesticide benzimidazoles shared similar chemical feature profiles relative to other benzimidazoles.  
208 We curated >80 commercially available compounds in the benzimidazole class spanning a diverse  
209 range including pesticides, fungicides, therapeutics, and preservatives. Upon hierarchical  
210 clustering of these benzimidazoles based on their chemical properties computed from JOELib's  
211 features matrix<sup>72,73</sup> (**File S5**), we found that pesticide benzimidazoles generally shared similar  
212 chemical properties and clustered together (**Fig. 4B**).

## 213 **Numerous commercially used benzimidazoles also function as vascular disrupting agents**

214 We next tested if pesticides exhibiting the epidemiological signature and clustering in the same  
215 clades by virtue of their chemical features would also specifically inhibit TUBB8 and function as  
216 VDAs. We selected 12 commercially used benzimidazole compounds across 2 clusters (**Fig. 4B**).  
217 Our list included 2 anthelmintics, both World Health Organization essential medicines  
218 (albendazole and mebendazole) prescribed to treat broad-spectrum human intestinal nematode  
219 infections; fenbendazole, an anthelmintic prescribed specifically for animals against  
220 gastrointestinal nematode parasites; 2 currently banned pesticides, benomyl and carbendazim,  
221 formerly used in agriculture; triclabendazole, specifically used to treat liver fluke infections; and  
222 5 proton-pump inhibitors (esomeprazole, lansoprazole, omeprazole, pantoprazole, and  
223 rabeprazole) used to treat gastrointestinal and stomach acid disorders. The latter set were from a  
224 different clade and did not exhibit the epidemiological signature, serving as negative controls.

225 We first took advantage of our humanized yeast strains to rapidly discriminate TUBB8-specific  
226 inhibition from general  $\beta$ -tubulin inhibition. We found that 5 of the 12 compounds tested  
227 selectively inhibited TUBB8, as evidenced by the growth profiles observed for the humanized  
228 strains when cultured in the presence of the drugs (**Fig. 5, S4**). Notably, none of the 5 proton pump  
229 inhibitors or colchicine exhibited any tubulin inhibition (**Fig. S4, S5A**), confirming the specificity  
230 of the epidemiological signature as a predictor of TUBB8 inhibition. In contrast, triclabendazole  
231 was generally toxic, behaving as a pan-isotype inhibitor (**Fig. S5B**).

232 Testing the 5 positive TUBB8-inhibiting compounds in *Xenopus laevis* embryos showed strong  
233 vascular disrupting activity for all 5 compounds (**Fig. 5**). As we observed previously for TBZ<sup>20</sup>,  
234 the gross morphology of the treated embryos was largely normal (**Fig. 5**). Thus, this broader class  
235 of benzimidazoles do in fact generally act as vascular disrupting agents in vertebrates.

236

## 237 **DISCUSSION**

238 In the >30 years of therapeutic research efforts in the angiogenesis field only a highly restricted  
239 set of drugs have yet been approved<sup>11</sup>. Given the frequent failure to successfully make it through  
240 clinical trials and the high costs and lengthy process associated with developing new compounds,  
241 drug repurposing can offer efficient alternatives in developing new patient therapies with

242 accelerated timeframes. This study represents a rather unconventional path to drug repurposing,  
243 leveraging a combination of model organisms, humanized yeast, cell culture, molecular modeling,  
244 and epidemiological data mining to determine TBZ's molecular target and mechanism of vascular  
245 action. Indeed, TBZ was initially identified as a VDA and angiogenesis inhibitor by using a  
246 Baker's yeast model of angiogenesis discovered in a computational search for orthologous  
247 phenotypes, or phenologs, aimed at exploiting deep evolutionary conservation to prioritize yeast  
248 processes relevant to human diseases<sup>18-20</sup>. Although obviously lacking blood vessels and a  
249 circulatory system, yeast nonetheless retains conserved biological pathways and processes relevant  
250 to vertebrate angiogenesis genes, and it was on the basis of these conserved processes that the  
251 antifungal compound TBZ was initially suspected, later confirmed, to be an angiogenesis  
252 inhibitor<sup>20</sup>.

253 While TBZ somewhat reduced the abundance of tubulin proteins in human cells<sup>20</sup>, at angiogenesis-  
254 inhibiting doses, the overall morphology of TBZ treated animals was normal, suggesting that only  
255 certain cell types, specifically those endothelial cells involved in forming the vasculature, might  
256 be uniquely susceptible to TBZ. Here, we find that TBZ does indeed specifically modulate the  
257 microtubules in vascular endothelial cells. Several currently identified microtubule targeting drugs  
258 have been reported to interfere with polymerization dynamics by binding  $\beta$ -tubulin<sup>11,16</sup> close to or  
259 at the colchicine binding site. Building on previous work<sup>27,48</sup>, our *in silico* modeling results suggest  
260 that TBZ's binding site, while in close proximity to the colchicine binding site, is distinct from it,  
261 thereby uncovering a novel  $\beta$ -tubulin effector site likely specific to other benzimidazoles and TBZ  
262 analogs.

263 In contrast to  $\beta$ -tubulin anticancer drugs, which have largely shown pan-isotype activity, to our  
264 knowledge, this study presents an unusual case of isotype-specific drug targeting in the  $\beta$ -tubulin  
265 gene family. Fungal suppressor studies on benzimidazole resistance have repeatedly found  
266 resistant mutations in  $\beta$ -tubulin; we found that 8 of 9 human  $\beta$ -tubulins natively harbor the same  
267 suppressor mutations and consequently exhibit unfavourable steric clashes interfering with TBZ  
268 binding. We demonstrate both *via* human cell culture microtubule assays and humanized yeast  
269 drug sensitivity tests that TBZ selectively targets only TUBB8 among the nine human  $\beta$ -tubulins,  
270 thus disrupting microtubule dynamics and reducing end-binding protein accumulation at the plus  
271 ends of microtubules in susceptible cells.

272 With TUBB8 thus acting as the specific target, it follows that of all human cell types, vascular  
273 endothelial cells must in turn be particularly sensitive to inhibition of TUBB8, leading to selective  
274 disruption of the vasculature relative to other human tissues. It remains to be seen why TBZ's  
275 vascular disrupting activity is restricted to immature or newly forming blood vessels, but we  
276 speculate that this subset of the vasculature lacks reinforcing cell-cell contacts typical of larger,  
277 more established vasculature, leading to greater sensitivity to TBZ-induced microtubule  
278 disruption. As  $\beta$ -tubulin isotypes tend to be broadly expressed and often substitute for one another  
279 in microtubule structures<sup>74,75</sup>, one possibility is that TUBB8 inhibition simply leads to the loss of  
280 interactions with endothelial cell-specific components, thus specifically impacting  
281 vasculogenesis/angiogenesis. However, gene-gene and gene-drug interactions can often proceed  
282 by less obviously direct mechanisms to selectively impact cell types or phenotype penetrance *via*  
283 conditional cell-specific or dosage-dependent synthetic interactions<sup>76,77</sup>. It would thus not be  
284 surprising for the consequences of inhibiting TUBB8 in vascular endothelial cells to be similarly  
285 indirectly mediated by endothelial cell-specific synthetic interactions. Further experiments  
286 characterizing TBZ's selective activity against newly forming/formed vasculature and the  
287 vascular-specific roles of TUBB8 in tetrapods could offer valuable insights into the cytoskeletal  
288 dynamics underlying vasculogenesis and angiogenesis.

289 Based on chemical properties and signature resistance mutations observed against benzimidazole  
290 compounds, we identified a larger class of extensively used fungicides and pesticides that all  
291 exhibit vascular disruption activity. While our results suggest possible new clinical applications  
292 for these compounds, they also highlight the potential caveats of their use in at-risk populations,  
293 especially for the two compounds (albendazole and mebendazole) that are FDA approved for  
294 human use. The WHO recommends the use of both albendazole and mebendazole as essential  
295 antihelmenthics worldwide for children up to the age of 14 against soil-transmitted helminth  
296 infections. Moreover, these compounds are widely used as public health interventions in pregnant  
297 women after the first trimester in regions where hookworm and whipworm infections exceed  
298 20%<sup>78,79</sup>. While in the US, the risk of mebendazole use during pregnancy has not been assigned,  
299 our data add weight to WHO recommendations that these drugs should not be administered in the  
300 first trimester of pregnancy and suggest their use be carefully evaluated in patients in which  
301 angiogenesis inhibition might pose risks, including using caution later in pregnancy in light of the  
302 evidence that the compounds disrupt immature vasculature and might prove harmful to a

303 developing fetus. Conversely, while efforts in the angiogenesis field have been often motivated  
304 towards developing anticancer therapies, the wide use of the compounds discussed here and their  
305 FDA-approved status could open alternative paths to treating other angiogenesis and/or vascular  
306 related diseases, such as diabetic retinopathy, macular degeneration, and hemangioma. It remains  
307 to be seen if other benzimidazoles sharing similar chemical profiles to those tested in our work  
308 (such as ciclobendazole, nocodazole, oxibendazole, and oxfendazole) also exhibit vascular  
309 disrupting activity.

310 More broadly, our framework of leveraging phenotypic relationships between species and  
311 repurposing model organisms to systematically explore drug mechanisms opens new routes for  
312 drug repurposing and discovery, and highlights the power of systems biology and evolution-guided  
313 approaches in advancing our knowledge of conserved genetic modules and how their disruption  
314 manifests in disease. This work also illustrates how duplicated genes diversify their functions and  
315 reinforces the therapeutic benefits of finding drugs specific to individual gene family members.  
316 As evidenced by the high degree of replaceability of conserved genes from cross-species  
317 complementation assays<sup>80-82</sup>, we anticipate that the combination of humanized yeast and  
318 phenolog-based disease modeling can be extended beyond vascular disruption to other conserved  
319 processes and therapies targeting them.

320

## 321 **MATERIALS AND METHODS**

### 322 **Multiple sequence alignment**

323 Human gene sequences were downloaded from the Uniprot database. The multiple sequence  
324 alignment for *S. pombe*, *S. cerevisiae*, and 9 human  $\beta$ -tubulin genes was constructed using MAFFT  
325 v7<sup>83</sup> and visualized in Geneious v10 (<https://www.geneious.com>).

### 326 **Molecular modeling of $\beta$ -tubulins**

327 Homology models of human and fungal  $\beta$ -tubulins were constructed using as a reference structure  
328 the previously determined *Ovis aries*  $\beta$ -tubulin crystal structures (PDB: 3UT5 and 3N2G)<sup>46,47</sup>. The  
329 template was prepared using the Molecular Operating Environment (MOE.09.2014) software

330 package from Chemical Computing Group. The structure was inspected for anomalies and  
331 protonated/charged with the Protonate3D subroutine (310K, pH 7.4, 0.1 M salt)<sup>84</sup>. The protonated  
332 structure was then lightly tethered to reduce significant deviation from the empirically determined  
333 coordinates and minimized using the Amber10:EHT forcefield with R-field treatment of  
334 electrostatics to an RMS gradient of 0.1 kcal mol<sup>-1</sup> Å<sup>-1</sup>. Homology models of the wild-type fungal  
335 β-tubulin were prepared by creating 25 main chain models with 25 sidechain samples at 298K (625  
336 total) within MOE. Intermediates were refined to an RMS gradient of 1 kcal mol<sup>-1</sup> Å<sup>-1</sup>, scored with  
337 the GB/VI methodology, minimized again to an RMS gradient of 0.5 kcal mol<sup>-1</sup> Å<sup>-1</sup> and protonated.  
338 The final model for each variant was further refined by placing the protein within a 6 Å water  
339 sphere and minimizing the solvent enclosed structure to an RMS gradient of 0.001 kcal mol<sup>-1</sup> Å<sup>-1</sup>.  
340 Models were evaluated by calculating Phi-Psi angles and superimposed against the reference  
341 structure. Homology models for each human β-tubulin were prepared similarly, based on  
342 generating a total of 625 models and averaging to make a final model for each β-tubulin isotype.

### 343 ***In silico* docking of TBZ into β-tubulins**

344 Potential binding sites were evaluated using the Site Finder application and recent computational  
345 work on benzimidazole binding to parasitic β-tubulins<sup>27,85</sup>. Conformational variants of TBZ were  
346 created in 3-D within MOE. A database of conformations was then used to dock TBZ to the wild-  
347 type homology model using induced fit and template similarity protocols. The placement was  
348 scored with Triangle Matcher and rescored with London dG. Poses were refined with the  
349 Amber10:EHT forcefield with GVBI/WSA dG scoring. Candidate poses were then identified by  
350 inspecting polar contacts. Geometry optimization was carried out with MOPAC 7.0 using AM1.  
351 Conformational analysis of the bound structure was evaluated with LowModeMD<sup>86</sup>. 2-D contact  
352 maps were created using Ligand Interactions<sup>87</sup>.

### 353 **Cell culture**

354 HUVEC cells were purchased from Clonetics and were used between passages 4 and 9. HUVECs  
355 were cultured on 0.1% gelatin-coated (Sigma) plates in endothelial growth medium-2 (EGM-2;  
356 Clonetics) in tissue culture flasks at 37 °C in a humidified atmosphere of 5% CO<sub>2</sub>. NIH-3T3 cells  
357 were obtained from Vishy Iyer at the University of Texas at Austin and cultured in Dulbecco's  
358 Modified Eagle's Medium (DMEM) with 10% bovine calf serum.

## 359 **Immunohistochemistry**

360 Cell lines were cultured in 6-well plates and treated with thiabendazole dissolved in 1% DMSO.  
361 Control cells received 1% DMSO. After 24 h, cells were fixed with methanol at -20 °C for 10 min  
362 and subsequently with 4% paraformaldehyde in PBS at room temperature for 10 min. Cell  
363 membranes were permeabilized with 0.2% Triton X-100 in PBS, and nonspecific antibody binding  
364 sites were blocked with 5% goat serum for 1 h at room temperature. Cells were incubated with  
365 primary antibodies to EB1 (BD Bioscience) and  $\alpha$ -tubulin (Sigma) at 4 °C overnight. After  
366 washing with PBST, primary antibodies were detected by Alexa Fluor-488 or 555 goat anti-rabbit  
367 or mouse immunoglobulin (IgG). 4',6-Diamidino-2-phenylindole (DAPI dye, Sigma) was added  
368 as needed to visualize nuclei.

## 369 **Cell transfection and perfusion**

370 EB3-eGFP cDNA obtained from Anna Akhmanova was cloned into the vector CS2+<sup>88</sup>. TUBB4  
371 (Origene, RG203945) and TUBB8 (Origene, RG213889) cDNAs were purchased and cloned into  
372 the vector CS107-RFP-3Stop. HUVEC cells were transfected by nucleofection (Lonza) according  
373 to the manufacturer's instructions. To analyze the effect of TBZ in living cells, we used a closed  
374 perfusion system (POC-R2, Pecon) connected to a peristaltic pump (Ismatec). 1% DMSO, 250  $\mu$ M  
375 TBZ or 1% DMSO diluted in EBM-2 medium was flowed at 100  $\mu$ l/min rate for the indicated  
376 times.

## 377 **Western blotting**

378 HUVECs were cultured in 6-well plates and treated with 1% DMSO or 1% DMSO, 250  $\mu$ M TBZ  
379 for 24 hours. Cells were lysed in cell lysis buffer (Cell Signaling Technology) containing 1 mM  
380 PMSF and analyzed by SDS-PAGE and western blotting using anti-EB1 (BD Bioscience) or anti-  
381 EB3 (Millipore) or anti-Clip170 (Santa Cruz) antibodies.

## 382 **Imaging and image analysis**

383 Immunohistochemistry experiments, live HUVECs, and live *KDR:GFP* transgenic *Xenopus laevis*  
384 were imaged using an inverted Zeiss LSM5 Pascal and Zeiss LSM700 confocal microscope, and  
385 super-resolution structured illumination (SR-SIM) combined with Zeiss LSM710 microscope.

386 Comet lengths were measured using the software Fiji. Confocal images were cropped and  
387 enhanced in Adobe Illustrator and Adobe Photoshop for the compilation of figures.

### 388 **Benzimidazole clustering analysis**

389 81 commercially used benzimidazole compounds spanning a wide range of classes were curated  
390 from PubChem<sup>89</sup>. JOELib (<http://joelib.sourceforge.net>), OpenBabel<sup>90</sup>, and Chem Mine features  
391 were computed using ChemMine tools<sup>73</sup>. Heatmaps were visualized using Morpheus  
392 (<https://software.broadinstitute.org/morpheus>). Clustergrams were generated by hierarchical  
393 clustering on the one minus Pearson correlation coefficient with average linkage.

### 394 **Humanizing yeast $\beta$ -tubulin using CRISPR-Cas9**

395 The human TUBB4 and TUBB8 open reading frames were integrated chromosomally (from start  
396 to stop codon) into *Saccharomyces cerevisiae* in place of the endogenous *TUB2* open reading  
397 frame using CRISPR/Cas9 genome editing as described in Akhmetov *et al.*<sup>91</sup>. Two sgRNAs were  
398 designed targeting the yeast *TUB2* locus using the Geneious (v10.2.6) CRISPR-Cas9 tools suite,  
399 purchased as oligos from IDT, and cloned into yeast CRISPR-K/O vectors using the yeast toolkit  
400 (YTK)<sup>92</sup> to express a synthetic guide RNA sequence, Cas9 nuclease, and a selectable marker  
401 (URA3)<sup>52,93</sup>. Repair templates were constructed by PCR amplification of the human  $\beta$ -tubulin ORF  
402 (from the human ORFeome<sup>94</sup>) flanked by 75 bp of target chromosomal boundary at the *TUB2*  
403 locus to facilitate recombination *via* homology directed repair. BY4741 (S288C) yeast strains were  
404 co-transformed with the CRISPR/Cas9 vector and repair template using Zymo Research Frozen-  
405 EZ Yeast Transformation II Kit. Transformants were selected on SC-URA media. Surviving  
406 colonies were screened by colony PCR, and Sanger sequenced to confirm replacement.

### 407 **Humanized yeast growth assays**

408 Assayed benzimidazole compounds were all dissolved in 100% DMSO to prepare stock solutions  
409 of 5 or 10 mg/ml based on solubility. Candidate VDA compounds were titrated in ranges of 5-  
410 1000  $\mu$ g/ml into growth medium depending on solubility (**Fig. S5** lists specific concentrations) for  
411 subsequent growth assays. Liquid growth assays were performed in triplicate in 96-well format  
412 using a Biotek Synergy HT incubating spectrophotometer. Humanized tubulin strains were pre-



413 cultured to saturation in YPD and diluted into 150  $\mu$ L of media to have  $0.05-0.1 \times 10^7$  cells/ml.  
414 Assays were typically run for 48 hrs with absorbance measured every 15 min.

#### 415 ***Xenopus* embryo manipulations and VDA assays**

416 *Xenopus* embryos were reared in 1/3 $\times$  Marc's modified Ringer's (MMR) solution. Each drug was  
417 treated to embryos from stage 31 until stage 38 with 10  $\mu$ g/ml or 20  $\mu$ g/ml in 1% DMSO diluted  
418 in 1/3X MMR. Embryos were fixed at stage 38 with MEMFA, and whole-mount *in situ*  
419 hybridization for *erg* was performed as described in Sive *et al.*<sup>87</sup>.

420

#### 421 **ACKNOWLEDGMENTS**

422 The authors thank Andrew Ellington for critical feedback and discussions. This research was  
423 funded by the American Heart Association Predoctoral fellowship (#18PRE34060258) to R.K.G.,  
424 Army Research Office (W911NF-12-1-0390) to J.D.G., Natural Sciences and Engineering  
425 Research Council (NSERC) of Canada Discovery grant (RGPIN-2018-05089), CRC Tier 2  
426 (NSERC/CRSNG-950-231904), and the Canada Foundation for Innovation and Québec Ministère  
427 de l'Économie, de la Science et de l'Innovation (#37415) to A.H.K., the National Institute of Child  
428 Health and Human Development (R01HD099191) to J.B.W., and from the Welch Foundation (F-  
429 1515) and National Institutes of Health (R35 GM122480) to E.M.M..

430

#### 431 **AUTHOR CONTRIBUTIONS**

432 Conceptualization and methodology, R.K.G., H.J.C., J.D.G., A.H.K., J.B.W., E.M.M.;  
433 Computational analyses, R.K.G., H.J.C., J.D.G.; Investigation, R.K.G., H.J.C, C.L., J.D.G.;  
434 Formal analysis and visualization, R.K.G., H.J.C., E.M.M.; Writing – R.K.G., H.J.C, J.B.W.,  
435 E.M.M.

436

#### 437 **COMPETING INTERESTS**

438 The authors declare no competing interest.

## 439 **FIGURE LEGENDS**

### 440 **Figure 1. Thiabendazole (TBZ) significantly reduces EB1 comet length at microtubule plus** 441 **ends in cultured human cells.**

442 Immunohistochemical analysis of  $\alpha$ -tubulin in two human cell lines using confocal microscopy  
443 does not show a definite distinction between 1% DMSO-treated control (**A, C**) and 1% DMSO,  
444 250  $\mu$ M TBZ-treated cell lines (**B, D**), but images from super-resolution microscopy reveal that  
445 the accumulation of end-binding (EB) protein 1 at the plus end of microtubules is significantly  
446 reduced with TBZ treatment (**B**) compared to the control (**A**) in HUVECs. In NIH-3T3 cells, the  
447 reduced EB1 comet length following TBZ treatment (**D**) compared to control (**C**) is not as  
448 pronounced as in HUVECs, as quantified by comet length (**E**). Scale bars, 20  $\mu$ m in (A) and (C),  
449 2  $\mu$ m in (A') and (C').

### 450 **Figure 2. Uncovering the molecular mechanism of thiabendazole.**

451 (**A**) TBZ elicits varying activity across different clades of life being toxic to fungal and nematode  
452 clades but behaves as a vascular disrupting agent in tetrapods. (**B**) Of the 9 human  $\beta$ -tubulins, 8  
453 have amino acids at positions 167, 198, and 200 that confer TBZ resistance to fungal tubulins (see  
454 Table S1), as seen in a multiple sequence alignment of human and *Schizosaccharomyces pombe*  
455  $\beta$ -tubulins; only TUBB8 lacks resistance mutations. (**C**) *In silico* docking of TBZ (orange) into a  
456 homology modeled yeast  $\beta$ -tubulin 3D structure (see Methods) indicates TBZ is well-  
457 accommodated by a binding pocket in wild-type yeast *NDA3* that abuts the 3 major  $\beta$ -tubulin TBZ  
458 resistance mutation sites. In contrast, docking of TBZ into homology models of human TUBB4  
459 and TUBB8 indicates the potential for differential binding, with TUBB8 accommodating TBZ  
460 whereas, in the case of TUBB4, TBZ is sterically blocked. Polar contacts are illustrated *via* dashed  
461 lines, and residues lining the proposed binding pocket are shown in cyan. Intramolecular hydrogen  
462 bonding between E198 and Y200 in TUBB4 reorganizes the geometry of the binding pocket.  
463 Residues involved in steric clashing are depicted with a partial mesh surface. (Note that due to  
464 steric clashes between TBZ and TUBB4 at the proposed binding pocket, TBZ was superimposed  
465 from our binding model to measure interactions).

466 **Figure 3. TBZ specifically inhibits the human  $\beta$ -tubulin TUBB8, not TUBB4, in humanized**  
467 **yeast and HUVEC cell culture.**

468 (A) Overview. TBZ's isotype specificity was identified in 2 ways. (Left) Recombinant human  $\beta$ -  
469 tubulins TUBB4 and TUBB8 were individually overexpressed in HUVEC cell culture to monitor  
470 comet lengths in the presence of TBZ. (Right) Using humanized yeast wherein yeast *TUB2* was  
471 singly humanized by either of 2 replaceable human  $\beta$ -tubulins TUBB4 or TUBB8 to screen for  
472 differential sensitivity towards TBZ. (B) Reduced EB3 comet length after 1% DMSO, 250  $\mu$ M  
473 TBZ treatment compared to 1% DMSO treated control. A. Comet length is similar in EB3, TUBB8  
474 transfected HUVECs compared to EB3 transfected controls expressing native tubulins, but comets  
475 are longer in most EB3, TUBB4 transfected cells. B. Comet length is statistically similar between  
476 cells treated with 1% DMSO; however, following 30 minutes of 1% DMSO, 250  $\mu$ M TBZ  
477 treatment *TUBB4* transfected cells have significantly longer EB3 comets than HUVECs with  
478 TUBB8 or expressing native tubulins. (C) Growth profiles of humanized yeast strains show TBZ's  
479 isotype specificity to TUBB8. When grown in the presence of TBZ, Strains carrying the wild-type  
480 *TUB2* (blue) and human TUBB8 (green) genes are sensitive to TBZ while humanized TUBB4  
481 strains (orange) are resistant. Mean +/- standard deviation indicated by solid lines and shaded  
482 boundaries, respectively.

483 **Figure 4. Global trends in benzimidazole resistance mutations and chemical structural**  
484 **similarities suggest numerous potential vascular disrupting agents.**

485 (A) 3  $\beta$ -tubulin mutations, (F167Y, E198A, F200Y) conferring benzimidazole resistance have  
486 been globally observed among parasitic nematode and fungal species. Each icon represents an  
487 instance of  $\beta$ -tubulin suppressor mutations occurring in benzimidazole resistant parasitic fungal or  
488 nematode species (See **File S1** for list of species showing benzimidazole resistance). (B)  
489 Commonly used benzimidazoles hierarchically clustered by their chemical properties suggest new  
490 vascular disrupting agents with similar molecular mechanisms to TBZ. (Left) Clustergram of 81  
491 widely used benzimidazole compounds spanning a wide range of drug classes grouped by chemical  
492 features (See **File S5** for the full list of compounds and features analysed). (Right) Zooms of black  
493 boxes indicate 3 clades containing TUBB8 specific VDA candidates (top) and proton-pump  
494 inhibitors (bottom).

495 **Figure 5. Commercially used benzimidazole pesticides, antifungals, and antihelmintics are**  
496 **also TUBB8-specific and disrupt vasculature.** *In situ* hybridization of blood vessels (using the  
497 *erg/flk1* probe<sup>18</sup>) in *Xenopus laevis* embryos indicate the disruption of the vasculature caused by  
498 the presence of human and animal antihelmintics and broad-spectrum pesticides as compared to  
499 the DMSO control. Insets show growth profiles for yeast strains with humanized  $\beta$ -tubulin TUBB4  
500 (orange) and TUBB8 (green) compared to wild-type (blue) when grown in the presence of each  
501 compound.

## 502 **Supplementary Figures**

503 **Figure S1. Homology modeling and *in silico* docking studies predict the TBZ binding site in**  
504 **the fungal  $\beta$ -tubulin *ND43* structure.** TBZ is well accommodated in wild-type *ND43*'s predicted  
505 binding pocket (**A**) as opposed to its F200Y mutant (**B**). 3D structures and 2D contact maps shown  
506 on the left and right respectively indicate the steric clashes TBZ faces in the F200Y binding pocket.  
507 Cyan meshes (in 3D structures) and red highlights on the ligand (in 2D contact maps) indicate  
508 steric clashes in the binding pocket

509 **Figure S2. Only TUBB8 favorably binds TBZ among the 9 human  $\beta$ -tubulins.**

510 (**A**) 2D contact maps highlight ligand interactions between TBZ and TUBB4 (left) or TUBB8  
511 (right). TBZ forms polar contacts with residues Q134, E198, F200, and L253 in TUBB8. In  
512 TUBB4, reorientation of the proposed binding pocket is observed. Substantial steric clashing is  
513 shown in red on TBZ. (**B**) *In silico* docking of TBZ into other human  $\beta$ -tubulin homology models  
514 suggests substantial steric clashes due to unfavorable binding pockets among 8/9 human  $\beta$ -tubulin  
515 isotypes. Cyan meshes (in 3D structures) and red highlights on the ligand (in 2D contact maps)  
516 indicate steric clashes in the binding pocket

517 **Figure S3. Yeast strains with modified  $\beta$ -tubulin are differentially sensitive to TBZ.**

518 (**A**) Deletion of yeast  $\alpha$ -tubulin *TUB3* makes *Saccharomyces cerevisiae* (Baker's yeast) sensitive  
519 to TBZ. (**B**) Growth profiles of *tub3 $\Delta$*  yeast strains with wild-type *TUB2* (blue), humanized  $\beta$ -  
520 tubulins TUBB4 (orange), or TUBB8 (green) in increasing concentrations of TBZ show  
521 differential sensitivities to the drug.

522 **Figure S4. Growth profiles of benzimidazole treated yeast strains.**

523 Plots depict varying doses of albendazole, benomyl, carbendazim, and colchicine. Our data show  
524 that colchicine is a pan-isotype inhibitor whereas albendazole, benomyl, and carbendazim show  
525 some degree of specificity for TUBB8.

526 **Figure S5. Proton-pump inhibitors do not elicit growth defects in humanized strains.**

527 (A) Yeast strains harboring the beta-tubulin gene *TUB2* (blue), TUBB4 (orange), and TUBB8  
528 (green) are not inhibited by proton pump inhibitors (drug conc. 40 µg/ml). (B) Triclabendazole is  
529 a pan-isotype β-tubulin inhibitor inhibiting both wild-type and humanized yeast strains (Left) and  
530 lethal to developing *Xenopus laevis* embryos at stage 38. (Right).

531

532 **Supplementary information**

533 **File S1.** Species resistance table curated from literature

534 **File S2.** Yeast site finder statistics

535 **File S3.** Docking free energy scores across β-tubulin isotypes

536 **File S4.** Yeast wt β-tubulin induced fit TBZ docking scores

537 **File S5.** Benzimidazole chemical features

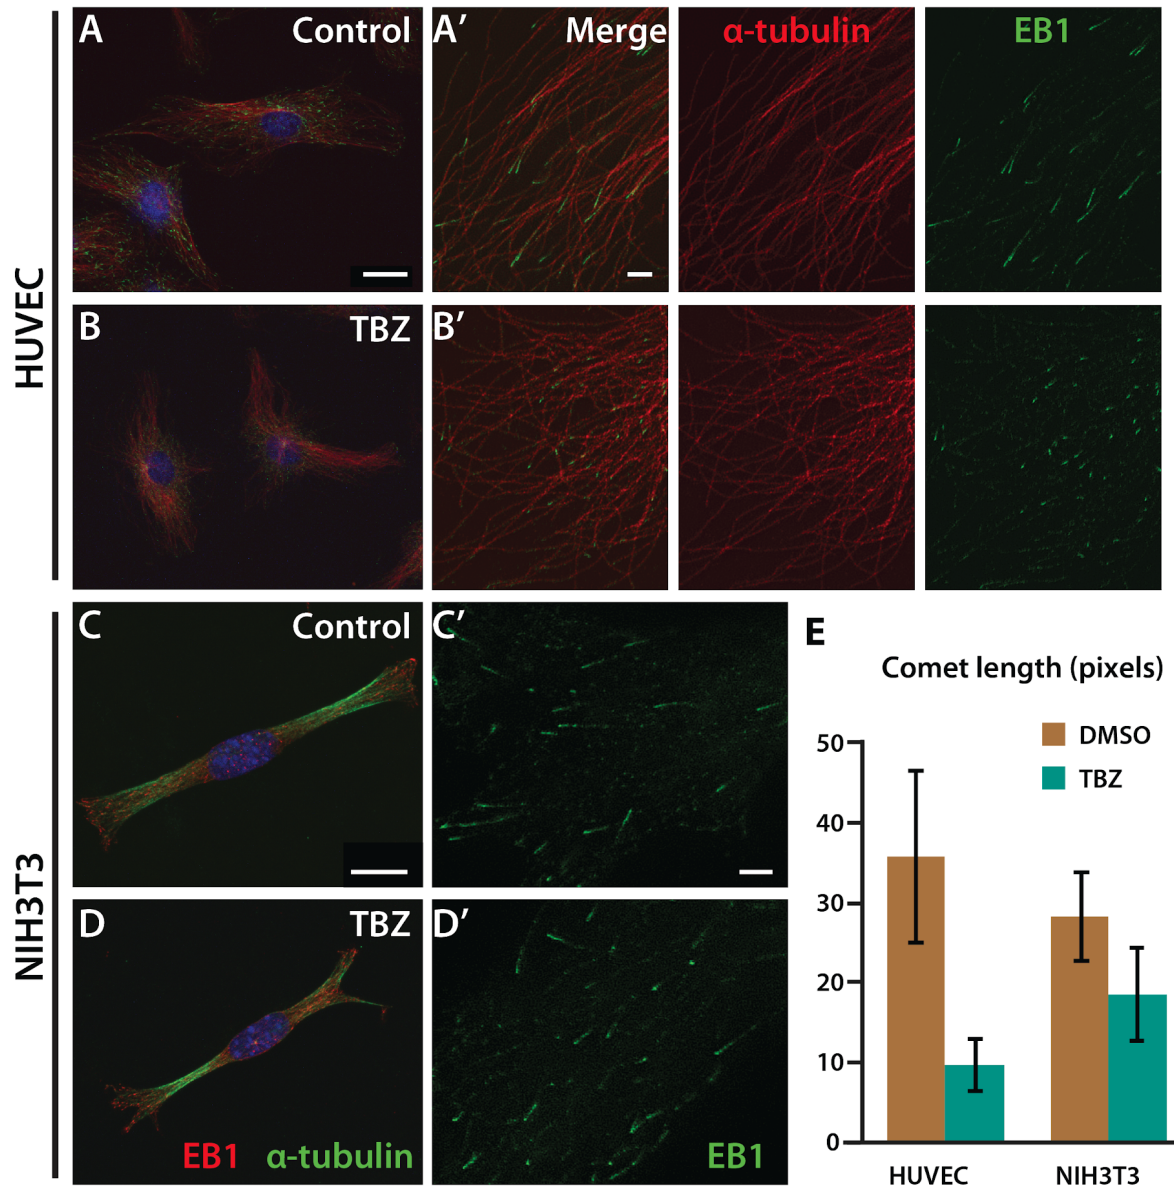

**Figure 1. TBZ significantly reduces EB1 comet length at microtubule plus ends in cultured human vascular endothelial cells.**

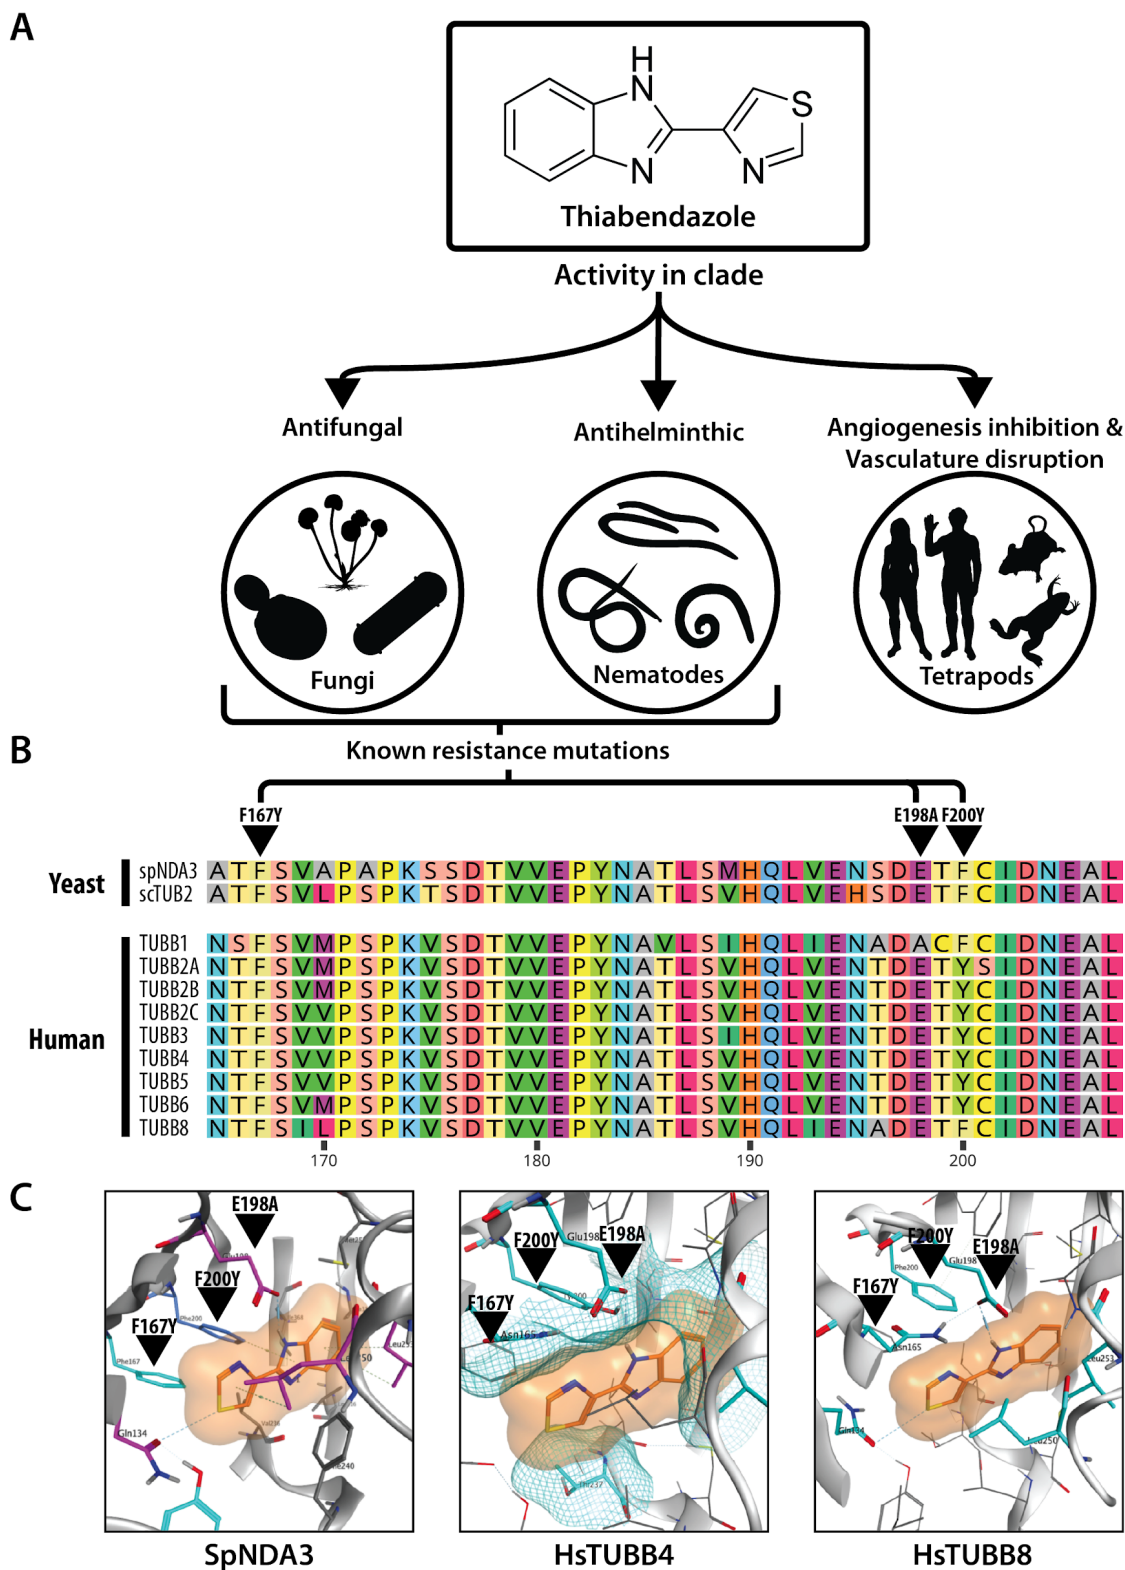

Figure 2. Uncovering the molecular mechanism of thiabendazole.

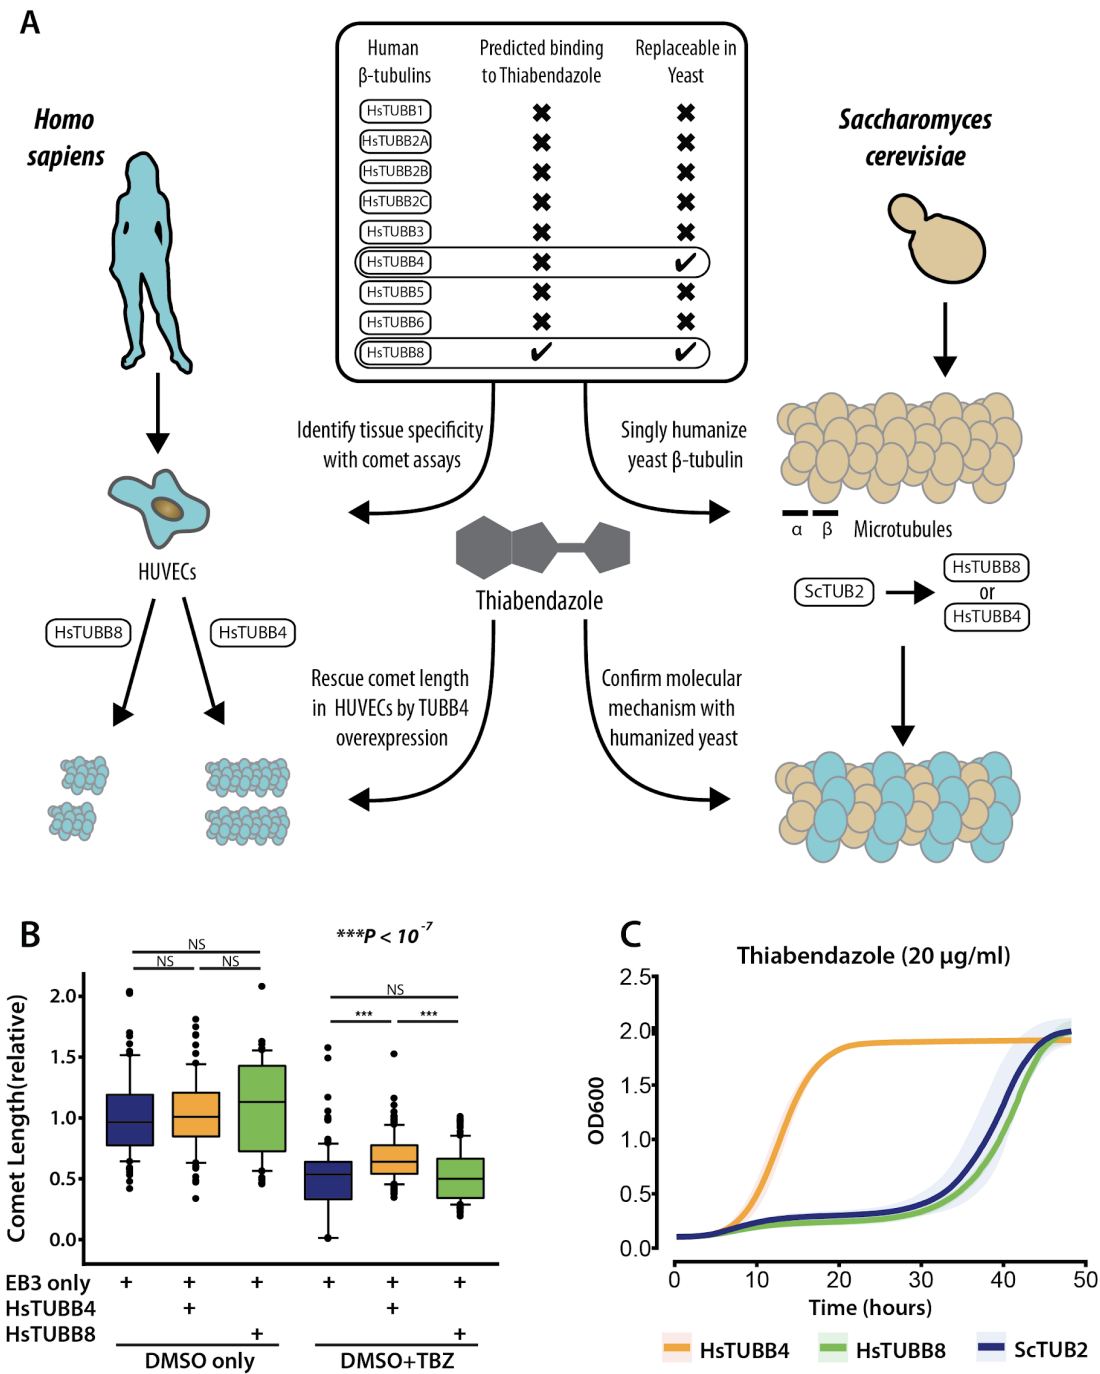

**Figure 3. TBZ specifically inhibits the human  $\beta$ -tubulin TUBB8, not TUBB4, in HUVEC cell culture and humanized yeast .**



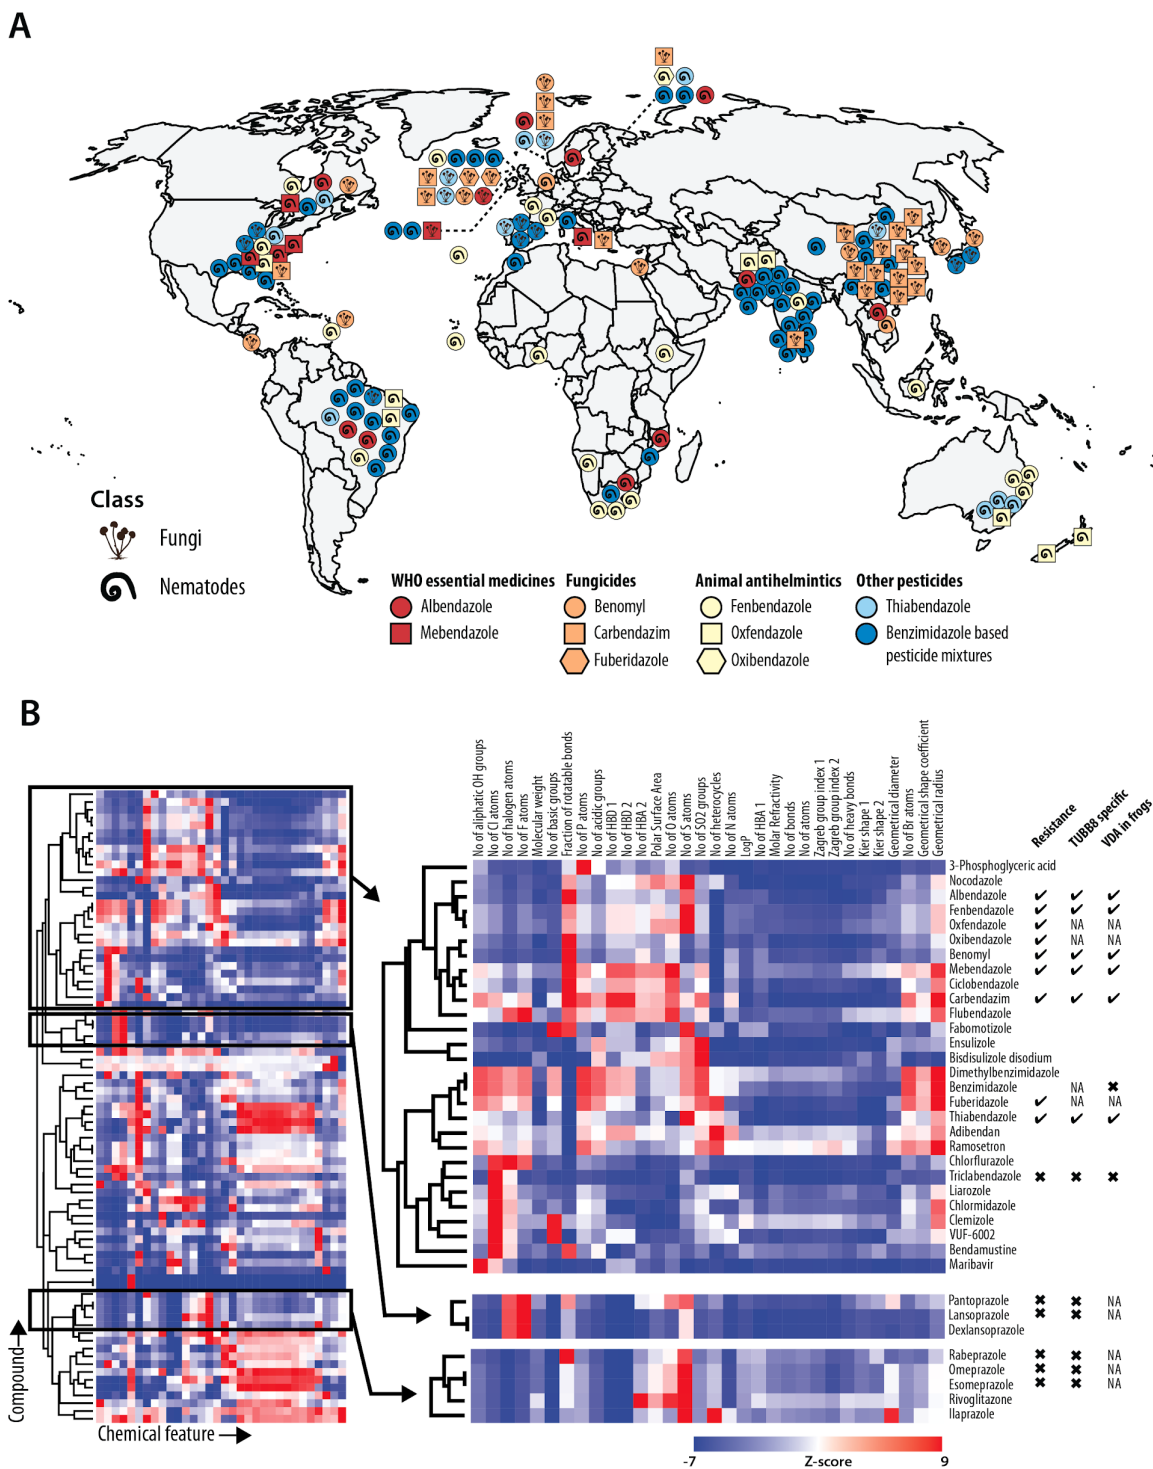

**Figure 4. Global trends in benzimidazole resistance mutations and chemical structural similarities suggest numerous potential vascular disrupting agents.**

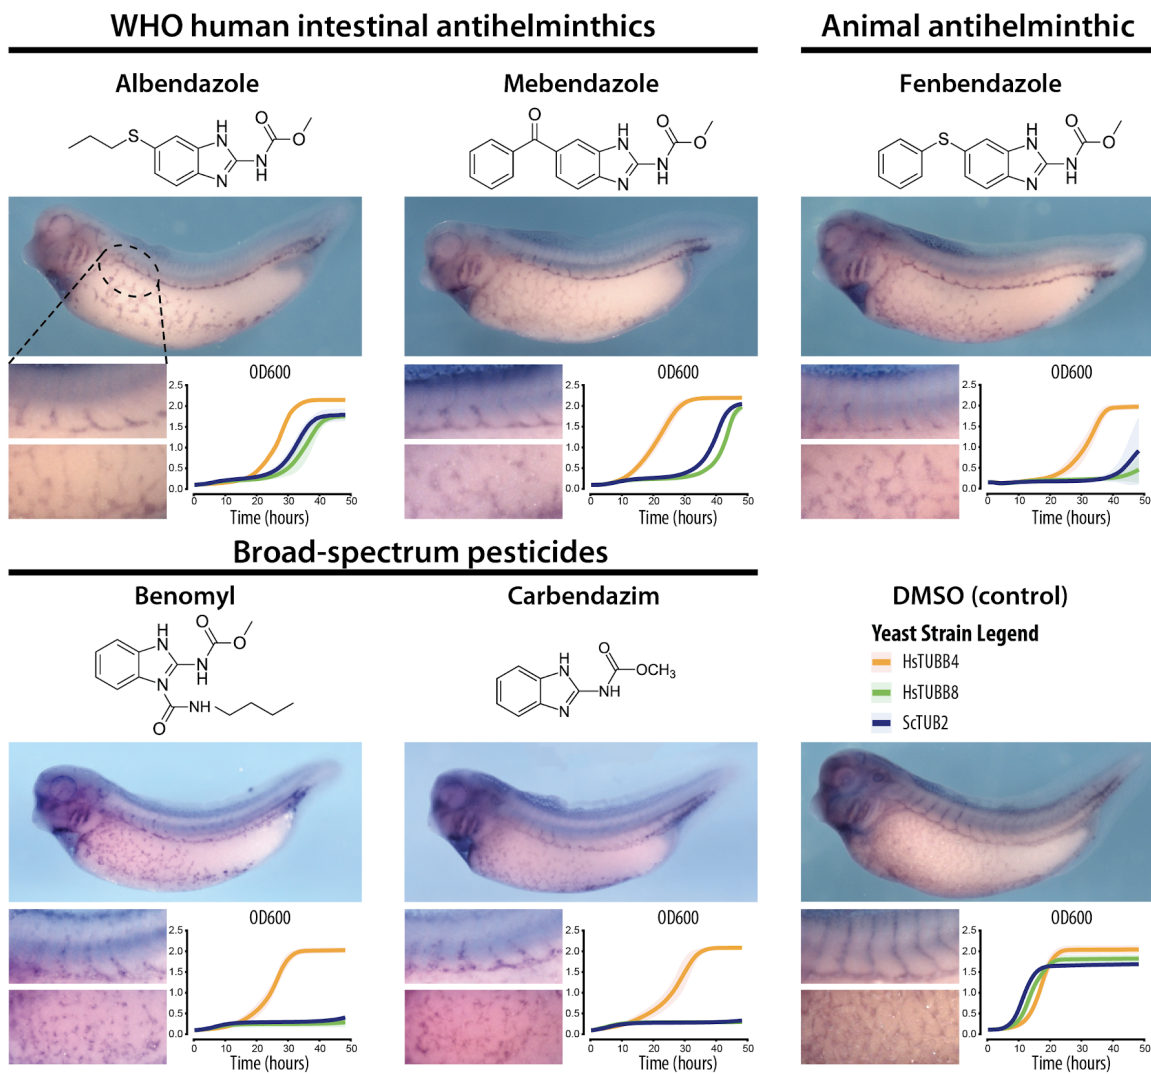

**Figure 5. Commercially used benzimidazole pesticides, antifungals, and antihelminthics are also TUBB8-specific and disrupt vasculature.**

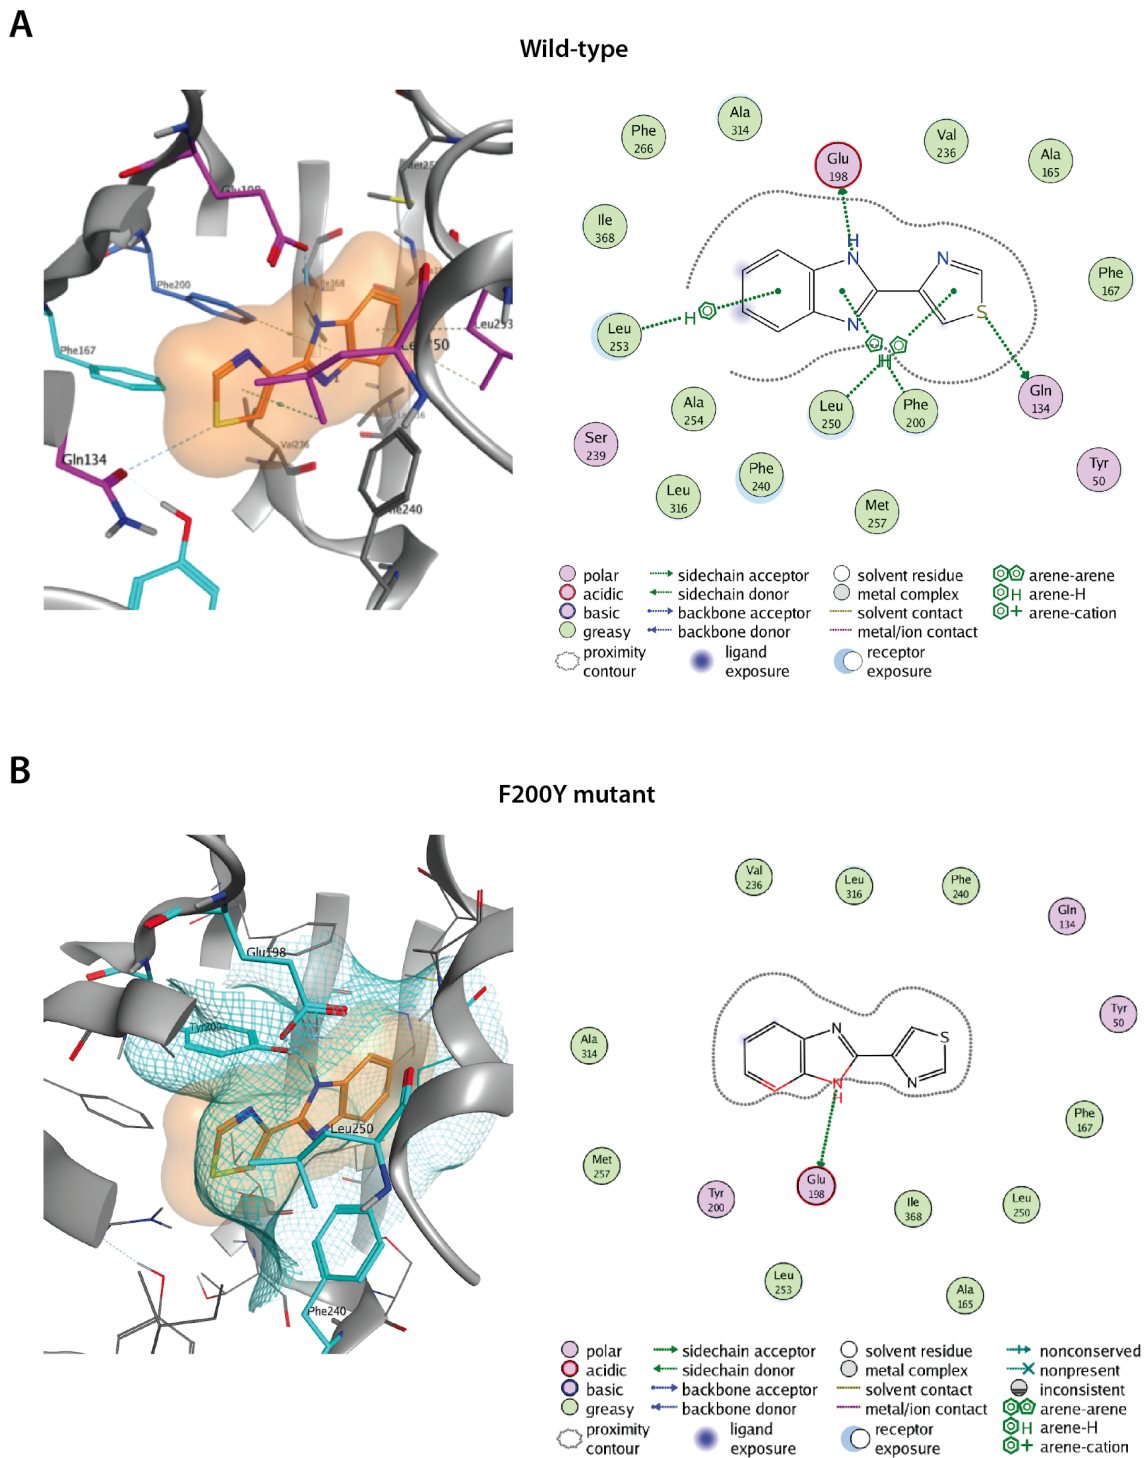

**Figure S1. Homology modeling and *in silico* docking studies predict the TBZ binding site in the fungal  $\beta$ -tubulin *NDA3* structure.**

**A**

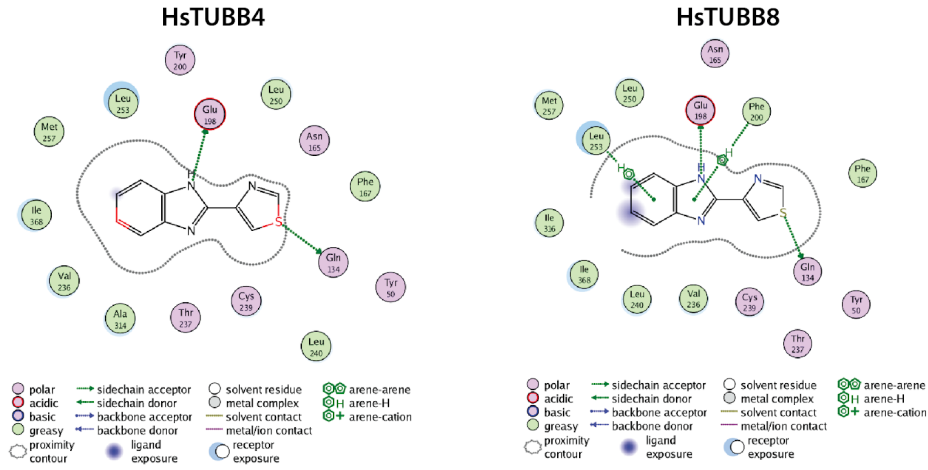

**B**

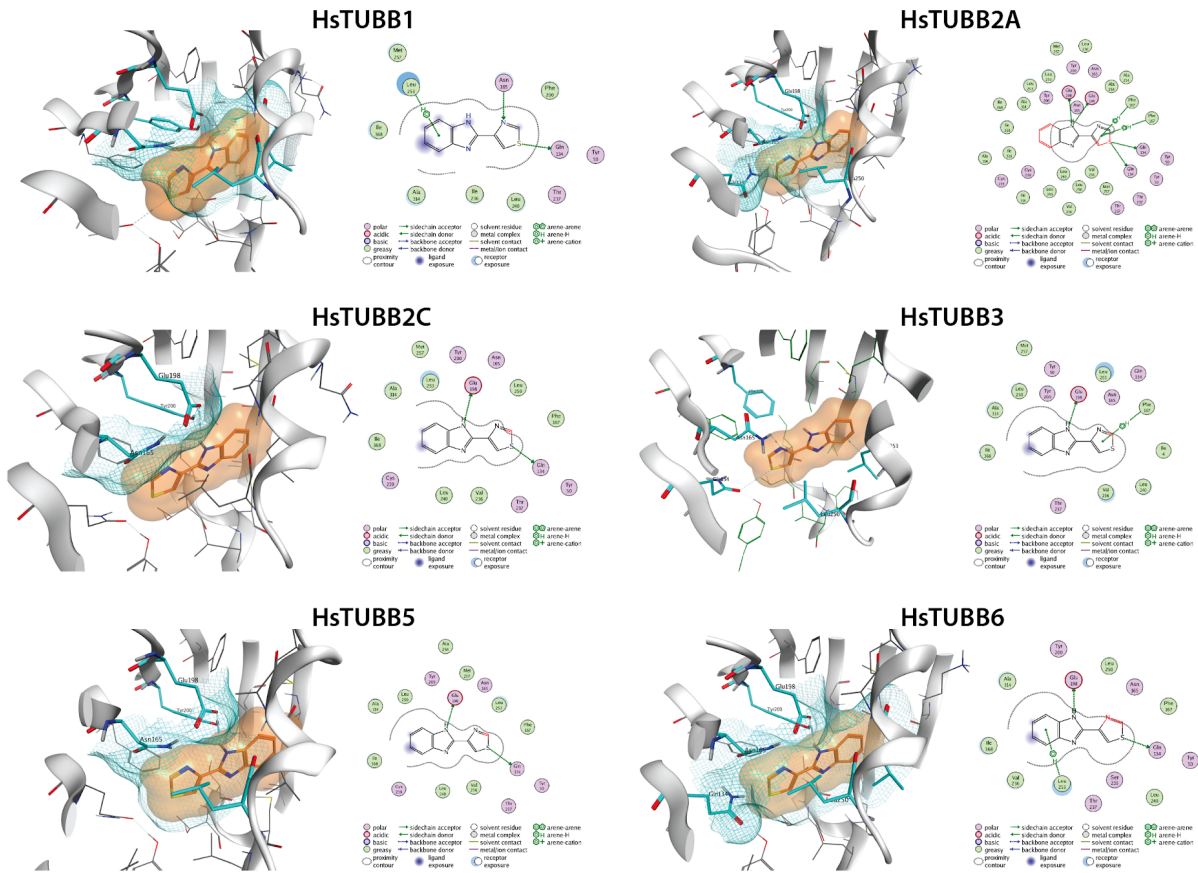

**Figure S2. Only TUBB8 favorably binds TBZ among the 9 human  $\beta$ -tubulins.**

**A**

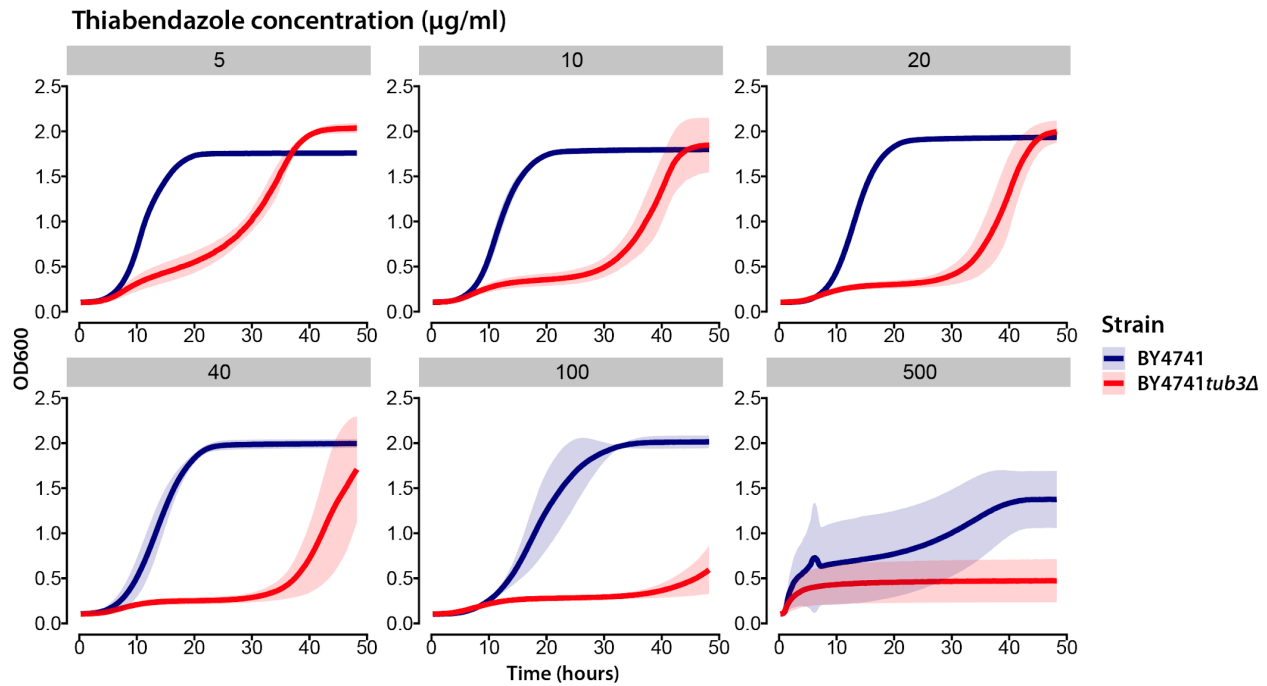

**B**

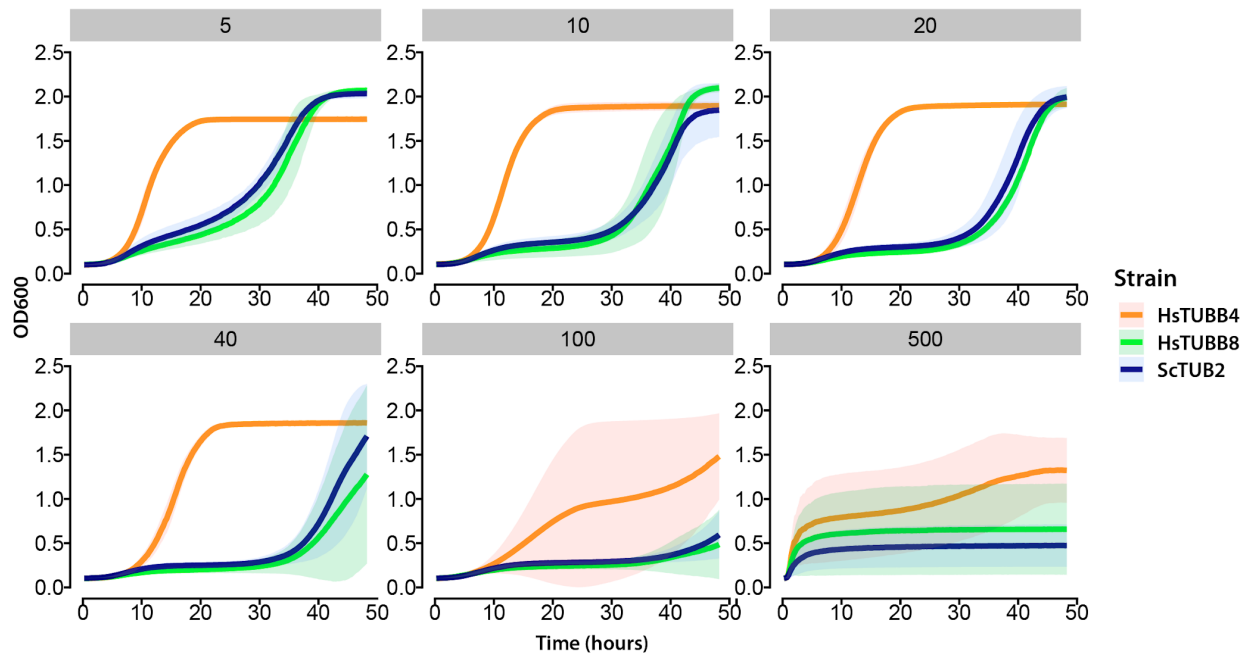

**Figure S3. Yeast strains with modified  $\beta$ -tubulin are differentially sensitive to TBZ.**

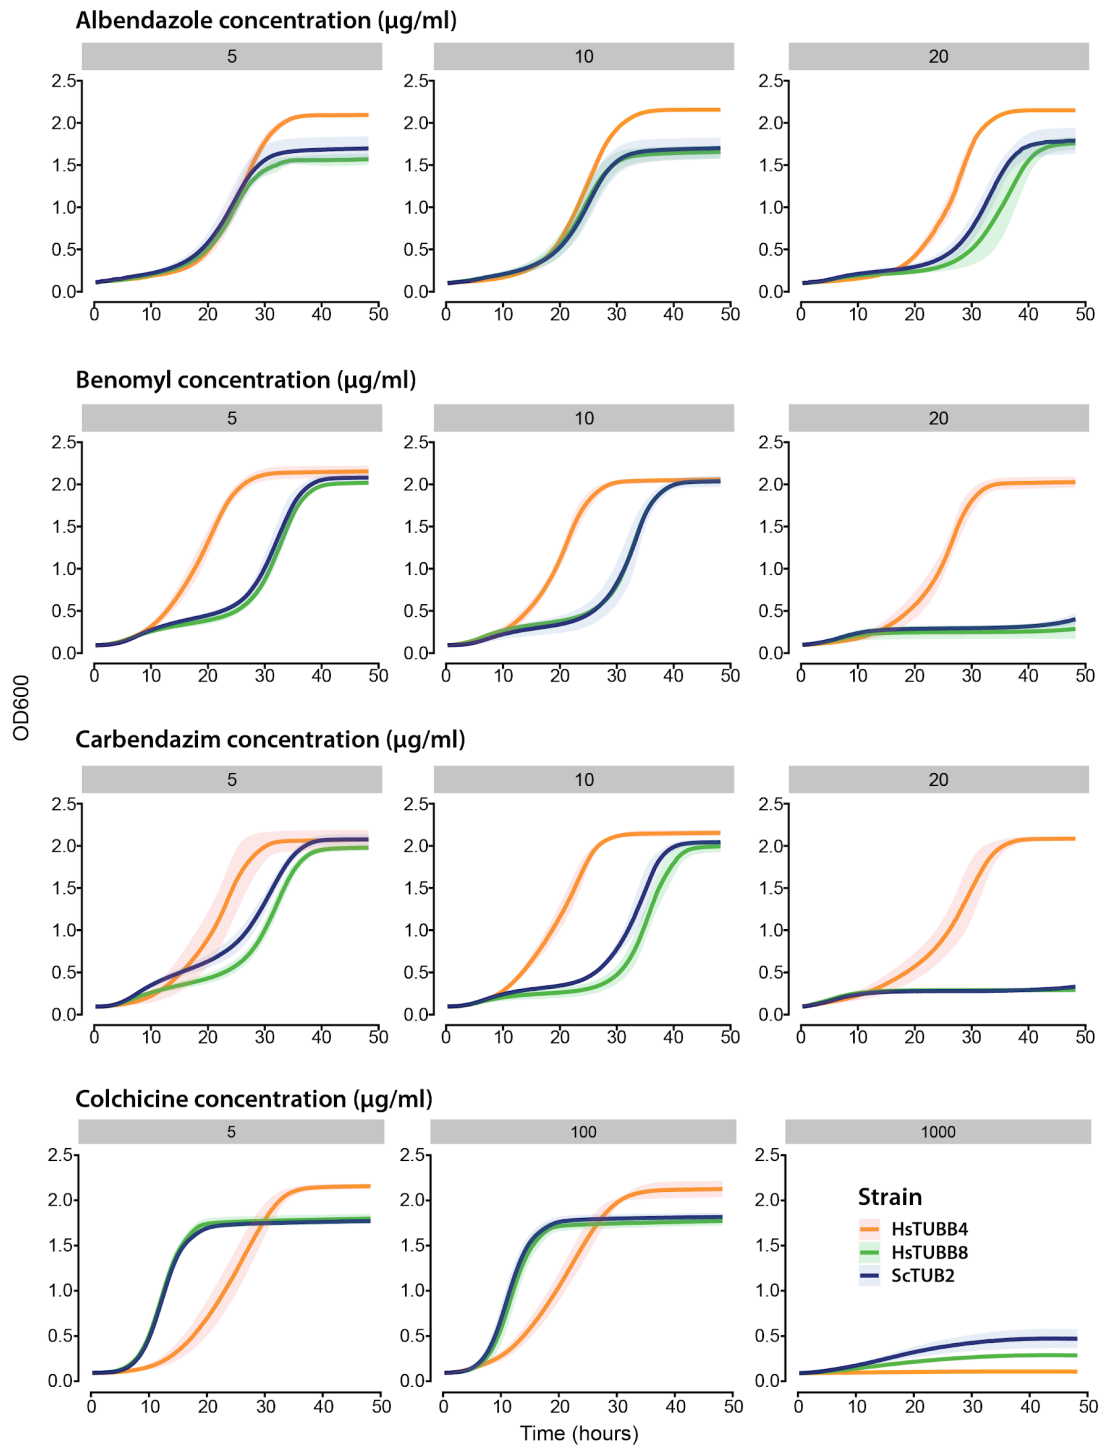

**Figure S4. Growth profiles of benzimidazole treated yeast strains.**

**A**

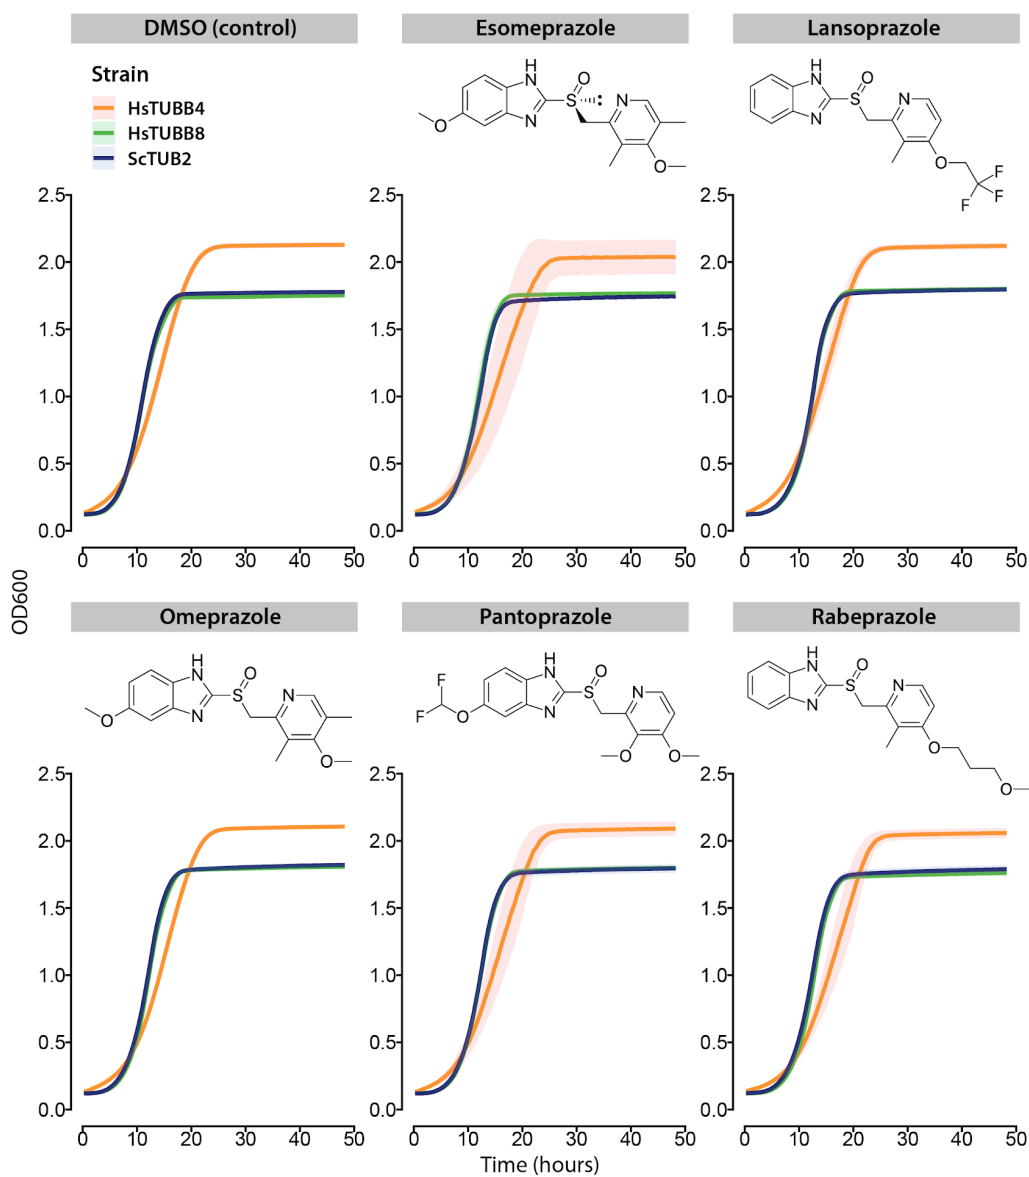

**B**

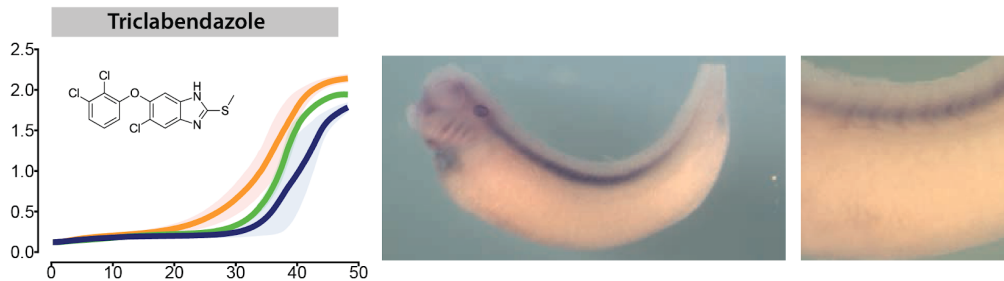

**Figure S5. Proton-pump inhibitors do not elicit growth defects in humanized strains.**

## 538 **References**

- 539 1. Carmeliet, P. Angiogenesis in life, disease and medicine. *Nature* **438**, 932–936 (2005).
- 540 2. Herbert, S. P. & Stainier, D. Y. R. Molecular control of endothelial cell behaviour during  
541 blood vessel morphogenesis. *Nature Reviews Molecular Cell Biology* **12**, 551–564 (2011).
- 542 3. Folkman, J. Opinion: Angiogenesis: an organizing principle for drug discovery? *Nature*  
543 *Reviews Drug Discovery* **6**, 273–286 (2007).
- 544 4. Kerbel, R. S. Tumor Angiogenesis. *New England Journal of Medicine* **358**, 2039–2049  
545 (2008).
- 546 5. Folkman, J. Endogenous angiogenesis inhibitors. *APMIS* **112**, 496–507 (2004).
- 547 6. O'Reilly, M. S. *et al.* Endostatin: an endogenous inhibitor of angiogenesis and tumor growth.  
548 *Cell* **88**, 277–285 (1997).
- 549 7. O'Reilly, M. S. *et al.* Angiostatin: a novel angiogenesis inhibitor that mediates the  
550 suppression of metastases by a Lewis lung carcinoma. *Cell* **79**, 315–328 (1994).
- 551 8. Nyberg, P., Xie, L. & Kalluri, R. Endogenous Inhibitors of Angiogenesis. *Cancer Res* **65**,  
552 3967–3979 (2005).
- 553 9. El-Kenawi, A. E. & El-Remessy, A. B. Angiogenesis inhibitors in cancer therapy:  
554 mechanistic perspective on classification and treatment rationales. *Br J Pharmacol* **170**, 712–  
555 729 (2013).
- 556 10. Heath, V. L. & Bicknell, R. Anticancer strategies involving the vasculature. *Nature Reviews*  
557 *Clinical Oncology* **6**, 395–404 (2009).
- 558 11. Hinnen, P. & Eskens, F. a. L. M. Vascular disrupting agents in clinical development. *British*  
559 *Journal of Cancer* **96**, 1159–1165 (2007).
- 560 12. Mason, R. P., Zhao, D., Liu, L., Trawick, M. L. & Pinney, K. G. A Perspective on Vascular  
561 Disrupting Agents that Interact with Tubulin: Preclinical Tumor Imaging and Biological  
562 Assessment. *Integr Biol (Camb)* **3**, 375–387 (2011).
- 563 13. Lippert, J. W. Vascular disrupting agents. *Bioorganic & Medicinal Chemistry* **15**, 605–615  
564 (2007).
- 565 14. Nowak-Sliwinska, P., van den Bergh, H., Sickenberg, M. & Koh, A. H. C. Photodynamic  
566 therapy for polypoidal choroidal vasculopathy. *Progress in Retinal and Eye Research* **37**,  
567 182–199 (2013).
- 568 15. Ibrahim, M. A. *et al.* Vascular disrupting agent for neovascular age related macular



- 569 degeneration: a pilot study of the safety and efficacy of intravenous combretastatin a-4  
570 phosphate. *BMC Pharmacology and Toxicology* **14**, 7 (2013).
- 571 16. Tozer, G. M., Kanthou, C. & Baguley, B. C. Disrupting tumour blood vessels. *Nat Rev*  
572 *Cancer* **5**, 423–435 (2005).
- 573 17. Cai, S. X. Small molecule vascular disrupting agents: potential new drugs for cancer  
574 treatment. *Recent Pat Anticancer Drug Discov* **2**, 79–101 (2007).
- 575 18. McGary, K. L. *et al.* Systematic discovery of nonobvious human disease models through  
576 orthologous phenotypes. *PNAS* **107**, 6544–6549 (2010).
- 577 19. Woods, J. O., Singh-Blom, U. M., Laurent, J. M., McGary, K. L. & Marcotte, E. M.  
578 Prediction of gene-phenotype associations in humans, mice, and plants using phenologs.  
579 *BMC Bioinformatics* **14**, 203 (2013).
- 580 20. Cha, H. J. *et al.* Evolutionarily Repurposed Networks Reveal the Well-Known Antifungal  
581 Drug Thiabendazole to Be a Novel Vascular Disrupting Agent. *PLOS Biology* **10**, e1001379  
582 (2012).
- 583 21. Taylor, R. D., MacCoss, M. & Lawson, A. D. G. Rings in Drugs: Miniperspective. *J. Med.*  
584 *Chem.* **57**, 5845–5859 (2014).
- 585 22. Skuce, P., Stenhouse, L., Jackson, F., Hypša, V. & Gilleard, J. Benzimidazole resistance  
586 allele haplotype diversity in United Kingdom isolates of *Teladorsagia circumcincta* supports  
587 a hypothesis of multiple origins of resistance by recurrent mutation. *International Journal*  
588 *for Parasitology* **40**, 1247–1255 (2010).
- 589 23. Davidse, L. C. & Flach, W. Interaction of thiabendazole with fungal tubulin. *Biochimica et*  
590 *Biophysica Acta (BBA) - General Subjects* **543**, 82–90 (1978).
- 591 24. EPA. Thiabendazole and salts R.E.D Factsheet. *United States Environmental Protection*  
592 *Agency* <https://www.epa.gov/>.
- 593 25. Lubega, G. W. & Prichard, R. K. Specific interaction of benzimidazole anthelmintics with  
594 tubulin: high-affinity binding and benzimidazole resistance in *Haemonchus contortus*.  
595 *Molecular and Biochemical Parasitology* **38**, 221–232 (1990).
- 596 26. Lacey, E. & Gill, J. H. Biochemistry of benzimidazole resistance. *Acta Tropica* **56**, 245–262  
597 (1994).
- 598 27. Aguayo-Ortiz, R. *et al.* Towards the identification of the binding site of benzimidazoles to  $\beta$ -  
599 tubulin of *Trichinella spiralis*: Insights from computational and experimental data. *Journal of*

- 600 *Molecular Graphics and Modelling* **41**, 12–19 (2013).
- 601 28. Vela-Corcía, D., Romero, D., Vicente, A. de & Pérez-García, A. Analysis of  $\beta$ -tubulin-  
602 carbendazim interaction reveals that binding site for MBC fungicides does not include  
603 residues involved in fungicide resistance. *Scientific Reports* **8**, 7161 (2018).
- 604 29. Driscoll, M., Dean, E., Reilly, E., Bergholz, E. & Chalfie, M. Genetic and molecular analysis  
605 of a *Caenorhabditis elegans* beta-tubulin that conveys benzimidazole sensitivity. *J. Cell Biol.*  
606 **109**, 2993–3003 (1989).
- 607 30. Hahnel, S. R. *et al.* Extreme allelic heterogeneity at a *Caenorhabditis elegans* beta-tubulin  
608 locus explains natural resistance to benzimidazoles. *PLOS Pathogens* **14**, e1007226 (2018).
- 609 31. Furtado, L. F. V. & Rabelo, É. M. L. Molecular analysis of the F167Y SNP in the  $\beta$ -tubulin  
610 gene by screening genotypes of two *Ancylostoma caninum* populations. *Veterinary*  
611 *Parasitology* **210**, 114–117 (2015).
- 612 32. Furtado, L. F. V., Bello, A. C. P. de P., dos Santos, H. A., Carvalho, M. R. S. & Rabelo, É.  
613 M. L. First identification of the F200Y SNP in the  $\beta$ -tubulin gene linked to benzimidazole  
614 resistance in *Ancylostoma caninum*. *Veterinary Parasitology* **206**, 313–316 (2014).
- 615 33. Ramünke, S. *et al.* Benzimidazole resistance survey for *Haemonchus*, *Teladorsagia* and  
616 *Trichostrongylus* in three European countries using pyrosequencing including the  
617 development of new assays for *Trichostrongylus*. *International Journal for Parasitology:*  
618 *Drugs and Drug Resistance* **6**, 230–240 (2016).
- 619 34. Yilmaz, E., Ramünke, S., Demeler, J. & Krücken, J. Comparison of constitutive and  
620 thiabendazole-induced expression of five cytochrome P450 genes in fourth-stage larvae of  
621 *Haemonchus contortus* isolates with different drug susceptibility identifies one gene with  
622 high constitutive expression in a multi-resistant isolate. *International Journal for*  
623 *Parasitology: Drugs and Drug Resistance* **7**, 362–369 (2017).
- 624 35. Zhang, Y.-J. *et al.* Effect of Carbendazim Resistance on Trichothecene Production and  
625 Aggressiveness of *Fusarium graminearum*. *MPMI* **22**, 1143–1150 (2009).
- 626 36. Ali, Q. *et al.* Emergence and the spread of the F200Y benzimidazole resistance mutation in  
627 *Haemonchus contortus* and *Haemonchus placei* from buffalo and cattle. *bioRxiv* 425660  
628 (2018) doi:10.1101/425660.
- 629 37. Baltrušis, P., Halvarsson, P. & Höglund, J. Exploring benzimidazole resistance in  
630 *Haemonchus contortus* by next generation sequencing and droplet digital PCR. *International*

- 631 *Journal for Parasitology: Drugs and Drug Resistance* **8**, 411–419 (2018).
- 632 38. Brown, M. C., Taylor, G. S. & Epton, H. a. S. Carbendazim resistance in the eyespot  
633 pathogen *Pseudocercospora herpotrichoides*. *Plant Pathology* **33**, 101–111 (1984).
- 634 39. Carter, H. E., Cools, H. J., West, J. S., Shaw, M. W. & Fraaije, B. A. Detection and  
635 molecular characterisation of *Pyrenopeziza brassicae* isolates resistant to methyl  
636 benzimidazole carbamates. *Pest Management Science* **69**, 1040–1048 (2013).
- 637 40. Nakaune, R. & Nakano, M. Benomyl resistance of *Colletotrichum acutatum* is caused by  
638 enhanced expression of  $\beta$ -tubulin 1 gene regulated by putative leucine zipper protein  
639 CaBEN1. *Fungal Genetics and Biology* **44**, 1324–1335 (2007).
- 640 41. Tolliver, S. C., Lyons, E. T., Drudge, J. H., Stamper, S. & Granstrom, D. E. Critical tests of  
641 thiabendazole, oxibendazole, and oxfendazole for drug resistance of population-B equine  
642 small strongyles (1989 and 1990). *Am. J. Vet. Res.* **54**, 908–913 (1993).
- 643 42. Yang, Y. *et al.* A new point mutation in  $\beta$ 2-tubulin confers resistance to carbendazim in  
644 *Fusarium asiaticum*. *Pesticide Biochemistry and Physiology* **145**, 15–21 (2018).
- 645 43. Zhu, Z.-Q., Zhou, F., Li, J.-L., Zhu, F.-X. & Ma, H.-J. Carbendazim resistance in field  
646 isolates of *Sclerotinia sclerotiorum* in China and its management. *Crop Protection* **81**, 115–  
647 121 (2016).
- 648 44. Dawson, P. J., Gutteridge, W. E. & Gull, K. A comparison of the interaction of anthelmintic  
649 benzimidazoles with tubulin isolated from mammalian tissue and the parasitic nematode  
650 *Ascaridia galli*. *Biochemical Pharmacology* **33**, 1069–1074 (1984).
- 651 45. Davidse, L. C. Benzimidazole Fungicides: Mechanism of Action and Biological Impact.  
652 *Annual Review of Phytopathology* **24**, 43–65 (1986).
- 653 46. Ranaivoson, F. M., Gigant, B., Berritt, S., Joullié, M. & Knossow, M. Structural plasticity of  
654 tubulin assembly probed by vinca-domain ligands. *Acta Crystallogr D Biol Crystallogr* **68**,  
655 927–934 (2012).
- 656 47. Barbier, P. *et al.* Stathmin and Interfacial Microtubule Inhibitors Recognize a Naturally  
657 Curved Conformation of Tubulin Dimers. *J. Biol. Chem.* **285**, 31672–31681 (2010).
- 658 48. Wang, Y. *et al.* Structures of a diverse set of colchicine binding site inhibitors in complex  
659 with tubulin provide a rationale for drug discovery. *The FEBS Journal* **283**, 102–111 (2016).
- 660 49. Leandro-García, L. J. *et al.* Tumoral and tissue-specific expression of the major human beta-  
661 tubulin isotypes. *Cytoskeleton (Hoboken)* **67**, 214–223 (2010).

- 662 50. Kavallaris, M. Microtubules and resistance to tubulin-binding agents. *Nat Rev Cancer* **10**,  
663 194–204 (2010).
- 664 51. Sirajuddin, M., Rice, L. M. & Vale, R. D. Regulation of microtubule motors by tubulin  
665 isotypes and post-translational modifications. *Nat. Cell Biol.* **16**, 335–344 (2014).
- 666 52. Garge, R. K., Laurent, J. M., Kachroo, A. H. & Marcotte, E. M. Systematic Humanization of  
667 the Yeast Cytoskeleton Discerns Functionally Replaceable from Divergent Human Genes.  
668 *Genetics* **215**, 1153–1169 (2020).
- 669 53. Schatz, P. J., Solomon, F. & Botstein, D. Genetically essential and nonessential alpha-tubulin  
670 genes specify functionally interchangeable proteins. *Mol. Cell. Biol.* **6**, 3722–3733 (1986).
- 671 54. Liu, S. *et al.* Carbendazim resistance and dimethachlone sensitivity of field isolates of  
672 *Sclerotinia sclerotiorum* from oilseed rape in Henan Province, China. *Journal of*  
673 *Phytopathology* **166**, 701–708 (2018).
- 674 55. Santos, J. M. L. dos *et al.* *Haemonchus contortus*  $\beta$ -tubulin isotype 1 gene F200Y and F167Y  
675 SNPs are both selected by ivermectin and oxfendazole treatments with differing impacts on  
676 anthelmintic resistance. *Veterinary Parasitology* **248**, 90–95 (2017).
- 677 56. Zhang, H. *et al.* A single-nucleotide-polymorphism-based genotyping assay for simultaneous  
678 detection of different carbendazim-resistant genotypes in the *Fusarium graminearum* species  
679 complex. *PeerJ* **4**, e2609 (2016).
- 680 57. Kumar, S. *et al.* Benzimidazole resistance in equine cyathostomins in India. *Veterinary*  
681 *Parasitology* **218**, 93–97 (2016).
- 682 58. Rupp, S. *et al.* *Botrytis fragariae*, a New Species Causing Gray Mold on Strawberries, Shows  
683 High Frequencies of Specific and Efflux-Based Fungicide Resistance. *Appl. Environ.*  
684 *Microbiol.* **83**, (2017).
- 685 59. Liu, S., Che, Z. & Chen, G. Multiple-fungicide resistance to carbendazim, diethofencarb,  
686 procymidone, and pyrimethanil in field isolates of *Botrytis cinerea* from tomato in Henan  
687 Province, China. *Crop Protection* **84**, 56–61 (2016).
- 688 60. Romero, R. A. & Sutton, T. B. Characterization of Benomyl Resistance in *Mycosphaerella*  
689 *fijiensis*, Cause of Black Sigatoka of Banana, in Costa Rica. *Plant Disease* **82**, 931–934  
690 (1998).
- 691 61. Xu, D. *et al.* Detection and characterization of carbendazim resistance in *Sclerotinia*  
692 *sclerotiorum* isolates from oilseed rape in Anhui Province of China. *Genet. Mol. Res.* **14**,

- 693 16627–16638 (2015).
- 694 62. Niciura, S. C. M. *et al.* F200Y polymorphism in the  $\beta$ -tubulin gene in field isolates of  
695 *Haemonchus contortus* and risk factors of sheep flock management practices related to  
696 anthelmintic resistance. *Veterinary Parasitology* **190**, 608–612 (2012).
- 697 63. Chagas, A. M. *et al.* F200Y polymorphism of the  $\beta$ -tubulin isotype 1 gene in *Haemonchus*  
698 *contortus* and sheep flock management practices related to anthelmintic resistance in eastern  
699 Amazon. *Veterinary Parasitology* **226**, 104–108 (2016).
- 700 64. Gossen, B. D., Rimmer, S. R. & Holley, J. D. First Report of Resistance to Benomyl  
701 Fungicide in *Sclerotinia sclerotiorum*. *Plant Disease* **85**, 1206–1206 (2001).
- 702 65. Keegan, J. D., Good, B., de Waal, T., Fanning, J. & Keane, O. M. Genetic basis of  
703 benzimidazole resistance in *Teladorsagia circumcincta* in Ireland. *Irish Veterinary Journal*  
704 **70**, 8 (2017).
- 705 66. Banno, S. *et al.* Genotyping of Benzimidazole-Resistant and Dicarboximide-Resistant  
706 Mutations in *Botrytis cinerea* Using Real-Time Polymerase Chain Reaction Assays.  
707 *Phytopathology* **98**, 397–404 (2008).
- 708 67. Middelberg, A. & McKenna, P. B. Oxfendazole resistance in *Nematodirus spathiger*. *New*  
709 *Zealand Veterinary Journal* **31**, 65–66 (1983).
- 710 68. Saeed, M., Iqbal, Z. & Jabbar, A. Oxfendazole Resistance in Gastrointestinal Nematodes of  
711 Beetal Goats at Livestock Farms of Punjab (Pakistan). *Acta Vet. Brno* **76**, 79–85 (2007).
- 712 69. Cabañas, R., Castellá, G., Abarca, M. L., Bragulat, M. R. & Cabañas, F. J. Thiabendazole  
713 resistance and mutations in the  $\beta$ -tubulin gene of *Penicillium expansum* strains isolated from  
714 apples and pears with blue mold decay. *FEMS Microbiol Lett* **297**, 189–195 (2009).
- 715 70. Jambre, L. F. L., Martin, P. J. & Webb, R. F. Thiabendazole Resistance in Field Populations  
716 of *Haemonchus Contortus*. *Australian Veterinary Journal* **55**, 163–166 (1979).
- 717 71. Zhang, Z. *et al.* Two benzimidazole resistance-associated SNPs in the isotype-1  $\beta$ -tubulin  
718 gene predominate in *Haemonchus contortus* populations from eight regions in China.  
719 *International Journal for Parasitology: Drugs and Drug Resistance* **6**, 199–206 (2016).
- 720 72. Cao, Y., Charisi, A., Cheng, L.-C., Jiang, T. & Girke, T. ChemmineR: a compound mining  
721 framework for R. *Bioinformatics* **24**, 1733–1734 (2008).
- 722 73. Backman, T. W. H., Cao, Y. & Girke, T. ChemMine tools: an online service for analyzing  
723 and clustering small molecules. *Nucleic Acids Res* **39**, W486–W491 (2011).

- 724 74. Uhlén, M. *et al.* Tissue-based map of the human proteome. *Science* **347**, 1260419 (2015).
- 725 75. UniProt: a worldwide hub of protein knowledge. *Nucleic Acids Res* **47**, D506–D515 (2019).
- 726 76. Burga, A., Casanueva, M. O. & Lehner, B. Predicting mutation outcome from early  
727 stochastic variation in genetic interaction partners. *Nature* **480**, 250–253 (2011).
- 728 77. O’Neil, N. J., Bailey, M. L. & Hieter, P. Synthetic lethality and cancer. *Nature Reviews*  
729 *Genetics* **18**, 613–623 (2017).
- 730 78. WHO | Deworming. *World Health Organization*  
731 [https://www.who.int/elena/titles/full\\_recommendations/deworming/en/](https://www.who.int/elena/titles/full_recommendations/deworming/en/).
- 732 79. WORLD HEALTH ORGANIZATION. *GUIDELINE: preventive chemotherapy to control*  
733 *soil-transmitted helminth infections in at-risk... population groups.* (WORLD HEALTH  
734 ORGANIZATION, 2018).
- 735 80. Laurent, J. M., Young, J. H., Kachroo, A. H. & Marcotte, E. M. Efforts to make and apply  
736 humanized yeast. *Brief Funct Genomics* **15**, 155–163 (2016).
- 737 81. Laurent, J. M. *et al.* Humanization of yeast genes with multiple human orthologs reveals  
738 functional divergence between paralogs. *PLOS Biology* **18**, e3000627 (2020).
- 739 82. Kachroo, A. H. *et al.* Systematic humanization of yeast genes reveals conserved functions  
740 and genetic modularity. *Science* **348**, 921–925 (2015).
- 741 83. Katoh, K. & Standley, D. M. MAFFT Multiple Sequence Alignment Software Version 7:  
742 Improvements in Performance and Usability. *Molecular Biology and Evolution* **30**, 772–780  
743 (2013).
- 744 84. Labute, P. Protonate3D: Assignment of ionization states and hydrogen coordinates to  
745 macromolecular structures. *Proteins* **75**, 187–205 (2009).
- 746 85. Aguayo-Ortiz, R. *et al.* Molecular basis for benzimidazole resistance from a novel  $\beta$ -tubulin  
747 binding site model | Elsevier Enhanced Reader. *Journal of Molecular Graphics and*  
748 *Modelling* doi:<https://doi.org/10.1016/j.jmglm.2013.07.008>.
- 749 86. Labute, P. LowModeMD—Implicit Low-Mode Velocity Filtering Applied to  
750 Conformational Search of Macrocycles and Protein Loops. *J. Chem. Inf. Model.* **50**, 792–800  
751 (2010).
- 752 87. Clark, A. M. & Labute, P. 2D Depiction of Protein–Ligand Complexes. *J. Chem. Inf. Model.*  
753 **47**, 1933–1944 (2007).
- 754 88. Stepanova, T. *et al.* Visualization of Microtubule Growth in Cultured Neurons via the Use of

- 755 EB3-GFP (End-Binding Protein 3-Green Fluorescent Protein). *J. Neurosci.* **23**, 2655–2664  
756 (2003).
- 757 89. Kim, S. *et al.* PubChem Substance and Compound databases. *Nucleic Acids Res* **44**, D1202–  
758 D1213 (2016).
- 759 90. O’Boyle, N. M. *et al.* Open Babel: An open chemical toolbox. *Journal of Cheminformatics*  
760 **3**, 33 (2011).
- 761 91. Akhmetov, A. *et al.* Single-step Precision Genome Editing in Yeast Using CRISPR-Cas9.  
762 *BIO-PROTOCOL* **8**, (2018).
- 763 92. Lee, M. E., DeLoache, W. C., Cervantes, B. & Dueber, J. E. A Highly Characterized Yeast  
764 Toolkit for Modular, Multipart Assembly. *ACS Synth. Biol.* **4**, 975–986 (2015).
- 765 93. Akhmetov, A. *et al.* Single-step Precision Genome Editing in Yeast Using CRISPR-Cas9.  
766 *Bio Protoc* **8**, (2018).
- 767 94. Lamesch, P. *et al.* hORFeome v3.1: A resource of human open reading frames representing  
768 over 10,000 human genes. *Genomics* **89**, 307–315 (2007).
